## Title

Decoding the porcine developing spatial processing system and production of human entorhinal stellate cell-like cells by a direct programming approach.

## 5 Author line

Tobias Bergmann<sup>1</sup>, Yong Liu<sup>1</sup>, Leo Mogus<sup>1</sup>, Julie Lee<sup>2,3</sup>, Ulrich Pfisterer<sup>4</sup>, Louis-Francois Handfield<sup>5</sup>, Andrea Asenjo-Martinez<sup>4</sup>, Irene Lisa-Vargas<sup>4</sup>, Stefan E Seemann<sup>6</sup>, Jimmy Tsz Hang Lee<sup>5</sup>, Nikolaos Patikas<sup>5</sup>, Birgitte Rahbek Kornum<sup>7</sup>, Mark Denham<sup>8</sup>, Poul Hyttel<sup>9</sup>, Menno P Witter<sup>10</sup>, Jan Gorodkin<sup>6</sup>, Tune H Pers<sup>3</sup>, Martin Hemberg<sup>5</sup>, Konstantin Khodosevich<sup>4</sup> and  
10 Vanessa Jane Hall\*<sup>1</sup>

## Author Affiliation

<sup>1</sup>Group of Brain Development and Disease, Department of Veterinary and Animal Sciences, Faculty of Health and Medical Sciences; University of Copenhagen, Frederiksberg C, 1870,  
15 Denmark.

<sup>2</sup>Novo Nordisk Foundation Center for Stem Cell Research, DanStem University of Copenhagen, 2200 Copenhagen, Denmark,

<sup>3</sup>Novo Nordisk Foundation Center for Basic Metabolic Research, Faculty of Health and Medical Sciences; University of Copenhagen, Copenhagen N, 2200, Denmark.

<sup>4</sup>Biotech Research and Innovation Centre (BRIC), Faculty of Health and Medical Sciences; University of Copenhagen, Copenhagen N, 2200, Denmark

<sup>5</sup>Wellcome Sanger Institute, Wellcome Genome Campus, Hinxton CB10 1SA, United Kingdom.

<sup>6</sup>Center for non-coding RNA in Technology and Health, Department of Veterinary and Animal Sciences, Faculty of Health and Medical Sciences; University of Copenhagen, University of Copenhagen, 1871 Frederiksberg C, Denmark

<sup>7</sup>Department of Neuroscience, Faculty of Health and Medical Sciences; University of Copenhagen, Copenhagen N, 2200, Denmark.

<sup>8</sup>DANDRITE, Denham Group, Aarhus University, Aarhus C, 8000, Denmark

<sup>9</sup>Disease, Stem Cells and Embryology, Department of Veterinary and Animal Sciences, Faculty of Health and Medical Sciences; University of Copenhagen, Frederiksberg C, 1870, Denmark.

<sup>10</sup>Kavli Institute for Systems Neuroscience, Faculty of Medicine and Health Sciences; Norwegian University of Science and Technology, Trondheim, 7030, Norway.

35

## Author List Footnotes:

\*Corresponding Author and lead contact: Vanessa Jane Hall

## Email addresses:

40 Yong Liu: [yong.liu@ki.se](mailto:yong.liu@ki.se)

Tobias Bergmann: [tobi@sund.ku.dk](mailto:tobi@sund.ku.dk)

Leo Mogus: [rnh644@alumni.ku.dk](mailto:rnh644@alumni.ku.dk)

Julie Lee: [julie.lee@sund.ku.dk](mailto:julie.lee@sund.ku.dk)

Ulrich Pfisterer: [ulrich.pfisterer@med.lu.se](mailto:ulrich.pfisterer@med.lu.se)

45 Louis-Francois Handfield: [lh20@sanger.ac.uk](mailto:lh20@sanger.ac.uk)

Andrea Asenjo-Martinez: [andrea.asenjo@bric.ku.dk](mailto:andrea.asenjo@bric.ku.dk)

Irene Lisa-Vargas: [irene.vargas@sund.ku.dk](mailto:irene.vargas@sund.ku.dk)

Stefan E Seemann: [sse@sund.ku.dk](mailto:sse@sund.ku.dk)

Jimmy Tsz Hang Lee: [tl7@sanger.ac.uk](mailto:tl7@sanger.ac.uk)

50 Nikolaos Patikas: [np13@sanger.ac.uk](mailto:np13@sanger.ac.uk)

Birgitte Rahbek Kornum: [kornum@sund.ku.dk](mailto:kornum@sund.ku.dk)

Mark Denham: [mden@dandrite.au.dk](mailto:mden@dandrite.au.dk)

Poul Hyttel: [poh@sund.ku.dk](mailto:poh@sund.ku.dk)

Menno P Witter: [menno.witter@ntnu.no](mailto:menno.witter@ntnu.no)

55 Jan Gorodkin: [gorodkin@sund.ku.dk](mailto:gorodkin@sund.ku.dk)

Tune H Pers: [tune.pers@sund.ku.dk](mailto:tune.pers@sund.ku.dk)

Martin Hemberg: [mhemberg@bwh.harvard.edu](mailto:mhemberg@bwh.harvard.edu)

Konstantin Khodosevich: [konstantin.khodosevich@bric.ku.dk](mailto:konstantin.khodosevich@bric.ku.dk)

Vanessa Jane Hall: [vh@sund.ku.dk](mailto:vh@sund.ku.dk)

60

**Corresponding Author:**

Vanessa Jane Hall: [vh@sund.ku.dk](mailto:vh@sund.ku.dk)

65

70 **Abstract**

Classic studies investigating how and when the entorhinal cortex (component of the memory processing system of the brain) develops have been based on traditional thymidine autoradiography and histological techniques. In this study, we take advantage of modern technologies to trace at a high resolution, the cellular complexity of the developing porcine medial entorhinal cortex by using single-cell profiling. The postnatal medial entorhinal cortex comprises 4 interneuron, 3 pyramidal neuron and 2 stellate cell populations which emerge from intermediate progenitor and immature neuron populations. We discover four MGE-derived interneurons and one CGE-derived interneuron population as well as several IN progenitors. We also identify two oligodendrocyte progenitor populations and three populations of oligodendrocytes. We perform a proof-of-concept experiment demonstrating that porcine scRNA-seq data can be used to develop novel protocols for producing human entorhinal cells in-vitro. We identified six transcription factors (*RUNX1A1*, *SOX5*, *FOXP1*, *MEF2C*, *TCF4*, *EYA2*) important in neurodevelopment and differentiation from one *RELN*<sup>+</sup> stellate cell population. Using a lentiviral vector approach, we reprogrammed human induced pluripotent stem cells into stellate cell-like cells which expressed *RELN*, *SATB2*, *LEF1* and *BCL11B*. Our findings contribute to the understanding of the formation of the brain's cognitive memory and spatial processing system and provides proof-of-concept for the production of entorhinal cells from human pluripotent stem cells in-vitro.

90 **Keywords**

Entorhinal cortex, development, stellate cell, speed cell, single-cell RNA sequencing, direct programming, induced pluripotent stem cells

95

100

## Introduction

Uncovering the temporal events in the emergence of different cell types in the developing entorhinal cortex (EC) is paramount for understanding the formation of cognitive memory and spatial processing. The EC has a pertinent role in the processing of memory and navigation, which is dependent on its intrinsic organization and extrinsic connectivity. Specific navigation-related functions have been discovered in the EC including object recognition (Ridley, Samson, Baker, & Johnson, 1988), processing speed movement (Kropff, Carmichael, Moser, & Moser, 2015), processing location (Quirk, Muller, Kubie, & Ranck, 1992), processing head-direction (Taube, Muller, & Ranck, 1990), recognizing proximal borders (Solstad, Boccara, Kropff, Moser, & Moser, 2008) and processing working memory (Olton, Walker, & Wolf, 1982). These functions signify the importance of the EC in spatial navigation and arise from subsets of firing cells from either the medial EC (MEC) or lateral EC (LEC). Extensive anatomical and neuronal electrophysiological classification of the EC has been performed (Canto & Witter, 2012a, 2012b; Canto, Wouterlood, & Witter, 2008) which has recently been supplemented with molecular characterization by single-cell RNA sequencing (scRNA-seq) in the adult EC (Grubman et al., 2019; Leng et al., 2021). Currently, none, or only very few genes can be used to identify the phenotypically identified cells, such as the grid cells, head-direction cells and speed cells and the locations of these cell types are only partially understood. In some cases, these phenotypic attributes appear to be derived from anatomically different cell types. For example, within the MEC, the grid cells are located in both the dorsal and ventral MEC (Stensola & Moser, 2016) and found across all cortical layers, though showing a preference in layer (L) II (Sargolini et al., 2006). However, the grid cells are considered to represent principal neurons including both stellate cells (SCs) and pyramidal neurons (Domnisoru, Kinkhabwala, & Tank, 2013; Rowland et al., 2018; Schmidt-Hieber & Hausser, 2013) suggestive of networking interrelations that govern their function. Gene markers that distinguish the SCs from the pyramidal neurons are Reelin (*RELN*) and Calbindin (*CALBI*), respectively (Fuchs et al., 2016; Leitner et al., 2016; Perez-Garcia et al., 2001; Seress, Leranth, & Frotscher, 1994; Varga, Lee, & Soltesz, 2010; Witter, Doan, Jacobsen, Nilssen, & Ohara, 2017), although a subpopulation of both types expresses both markers (Witter et al., 2017). Reelin is also expressed in Fan cells which reside in the superficial layer of the LEC and these neurons are important for object recognition (Germroth, Schwerdtfeger, & Buhl, 1989; Nilssen et al., 2018). A specialized grid cell, the conjunctive grid cell, fires when a grid vertex is crossed upon heading in a specific direction. It is absent from LII, mostly present in LIII and LIV, but can also be found in LVI (Sargolini et al., 2006). The head-direction cells are principal neurons found in LII to LVI and are absent from LII (Giocomo et al., 2014; Sargolini et al., 2006). The border cells are also considered to be principal neurons and are found within all the MEC layers (Solstad et al., 2008) which often overlap with a SC identity (Tang et al., 2014). The speed cells map to GABAergic inhibitory neurons which express parvalbumin (PVALB), but not somatostatin (SST) (Ye, Witter, Moser, & Moser, 2018).

A clearer understanding of the molecular landscape of the EC may help to reconcile the anatomical, functional and connective profiles of the cell types that exist in the EC which would further improve our understanding of spatial navigation processing. One single-cell RNA sequencing (scRNA-seq) study was recently published on the EC from Alzheimer's disease (AD) patient and healthy brains, however, the vast majority of cells captured in their dataset were oligodendrocytes (Grubman et al., 2019). A second study has highlighted the transcriptional profiles of several excitatory neurons and glia in the adult EC, but does not decipher the cell types residing in the LEC or the MEC (Leng et al., 2021). Further, in both studies the research concentrated on differences between healthy and disease state rather than on the characterization of the cell types *per se*. We envisage a more comprehensive analysis of

the EC cell types as they emerge during development can provide further insight into the formation processes within the EC and insight into transcriptional changes that regulate maturation and connectivity of the EC.

155 Studying the signaling cascades that regulate the differentiation of brain cell types has resulted  
in novel protocols for producing several neuronal cell subtypes in-vitro from pluripotent stem  
cells. Protocols exist for production of, for example, multipotent neuroepithelia (Falk et al.,  
2012; W. Li et al., 2011; Nat et al., 2007), radial glia (Bamba et al., 2014; Bouhon, Joannides,  
160 Kato, Chandran, & Allen, 2006; Duan, Peng, Pan, & Kessler, 2015; Gorris et al., 2015;  
Hofrichter et al., 2017; Liour et al., 2006; Nat et al., 2007; Onorati et al., 2010; Reinchisi,  
Limaye, Singh, Antic, & Zecevic, 2013), glutamatergic neurons (Cao et al., 2017; Chuang,  
Tung, Lee-Chen, Yin, & Lin, 2011; Reyes et al., 2008; Thoma et al., 2012), GABAergic  
neurons (Barretto et al., 2020; Shin, Palmer, Li, & Fricker, 2012; Sun et al., 2016; Yang et al.,  
2017), midbrain dopaminergic neurons (Daadi, 2019; Jo et al., 2016; Jovanovic et al., 2018;  
165 Kikuchi et al., 2017; Kriks et al., 2011; Studer, 2012; Tofoli et al., 2019; Xue et al., 2019; P.  
Zhang, Xia, & Reijo Pera, 2014), 5-HT neurons (Bethea, Reddy, Pedersen, & Tokuyama, 2009;  
Kumar, Kaushalya, Gressens, Maiti, & Mani, 2009; Lu et al., 2016; Shimada et al., 2012;  
Vadodaria, Marchetto, Mertens, & Gage, 2016), motor neurons (Bianchi et al., 2018; Chipman,  
Toma, & Rafuse, 2012; Dimos et al., 2008; Sances et al., 2016) and enteric neurons (Barber,  
170 Studer, & Fattahi, 2019; Workman et al., 2017). This process can be orchestrated via indirect  
differentiation using exogenous factors and/or small molecules added to the media, or by  
directly programming the cells into the desired end phenotype by using targeted overexpression  
of regulatory transcription factors (K. Li et al., 2016; Oh & Jang, 2019; Qin, Zhao, & Fu, 2017).  
Producing neurons of the EC from human iPSCs would provide a useful model for studying the  
175 functions of individual cell types but also be useful in modeling diseases which affect the EC,  
such as AD. Recent research has highlighted that both Reelin+ and *RORB*+ neurons in the EC  
are particularly vulnerable to either accumulating Amyloid beta, neurofibrillary tangles or  
dying early in the disease (Kobro-Flatmoen, Nagelhus, & Witter, 2016; Leng et al., 2021) and  
studying these cell types further will help to elucidate why select populations of neurons in the  
180 EC are particularly vulnerable to the disease. We therefore aim to determine the key regulatory  
transcription factors in entorhinal Reelin+ cells in order to create a novel direct programming  
protocol for producing these neurons in-vitro. In light of difficulties in obtaining human fetal  
tissues from the second and third trimester to investigate EC development, we used an alternate  
large mammal, the pig. The pig develops a gyrencephalic brain midway through gestation,  
185 similar to humans and our recent research confirms it to be an excellent model of the developing  
human EC that recapitulates neurogenesis more closely in the human than rodents (Liu et al.,  
2021). We focus our attention on the MEC given the phenotypes and connectivity of several  
cell types are well studied but the molecular genotypes residing within the MEC are not well  
delineated.

190 In this study, we determine the molecular profiles of the neural cell types within the developing  
and postnatal MEC using scRNA-seq and identify entorhinal specific neuron subtypes. We then  
identify potential regulators of differentiation in interesting *RELN*+ excitatory neuron  
populations by performing differential expression of transcription factors. Focusing on one  
195 *RELN*+ population, we transduce six selected transcription factors using a lentiviral  
overexpression approach and directly program human induced pluripotent stem cells (iPSCs)  
into *RELN*+ entorhinal SC-like progenitors.

200



## Results

### ScRNA-seq reveals thirty two cell populations in the developing MEC

205 ScRNA-seq is a powerful approach for revealing the molecular identity of cell types in the  
different types of tissue, including the brain. We used this methodology to investigate the timing  
in the emergence of different cell types of the EC and their molecular identity during  
development and postnatal maturation. ScRNA-seq was performed using the 10X Genomics  
210 microfluidics-based Chromium platform on whole-cells isolated from the EC at embryonal day  
50 (E50), E60, E70 and postnatal day 75 (P75), and isolated nuclei in the later stages of  
development at E70 and P75 to ensure efficient capture of the neurons in the tissue (Figure 1A).  
We chose to integrate datasets for all age groups into a one-dimension reduction analysis as  
opposed to analyzing time points separately to ensure superior normalization and to allow us to  
215 easily cross-label cell types that existed both during fetal development and in the postnatal  
brain. We excluded red blood cells (expressing hemoglobin subunits *HBB*, *HBE1*, *HBM*, *HBZ*  
and on average, only 291 genes per cell) and vascular cells (*PDGFRB*<sup>+</sup>/*PECAMI*<sup>+</sup>) from our  
dataset, which left 24,294 cells (mean of 2798 different genes per cell) for further analyses. We  
log-normalized each sample dataset, merged all samples, batch corrected by FastMNN  
(Haghverdi, Lun, Morgan, & Marioni, 2018) and performed cell clustering in Seurat (Figure  
220 1A). Clustering of the merged dataset revealed thirty-two distinct cell clusters (Figure 1B) with  
many clusters represented by cells from datasets across different batches with good integration  
of batched within same age (Figure 1C). The clusters could be delineated into 6 main cell  
populations demarcated by canonical markers for intermediate progenitor cells (IPs,  
*PAX6*<sup>+</sup>/*EOMES*<sup>+</sup>/*NEUROD1*<sup>+</sup>), excitatory neurons (Excitatory,  
225 *TBR1*<sup>+</sup>/*EMX1*<sup>+</sup>/*SATB2*<sup>+</sup>/*BCL11B*<sup>+</sup>/*SLC17A6*<sup>+</sup>/*SLC17A7*<sup>+</sup>/*DCX*<sup>+</sup>), GABAergic interneurons  
(IN,*GAD1*<sup>+</sup>/*GAD2*<sup>+</sup>/*DCX*<sup>+</sup>), microglia (Microglia, *AIF1*<sup>+</sup>/*CXCR3*<sup>+</sup>/*PTPRC*<sup>+</sup>/*CSF1R*<sup>+</sup>),  
oligodendroglia (Oligo, *MBP*<sup>+</sup>/*CLDN11*<sup>+</sup>/*OLIG1*<sup>+</sup>/*PDGFRA*<sup>+</sup>), astrocytes  
(*AQP4*<sup>+</sup>/*GFAP*<sup>+</sup>/*GLAST*<sup>+</sup>) and radial glia (RGC, *HES1*<sup>+</sup>/*SOX2*<sup>+</sup>) (Figure 1D). Cluster 30,  
230 contained a small number of cells (n=70) which contained twice as many transcripts and genes  
expressed (Figure 1C) which we believed to be doublets and which failed to be removed by the  
data-preprocessing. Cluster 31 expressed *MBP* (Figure 1C) but was also omitted from the sub-  
analysis, as the highest enriched genes in this cluster were mitochondrial genes (Figure S1A)  
and may likely be dying cells. Furthermore, we validated our marker-expression driven  
235 annotations by projecting our dataset using scmap (Kiselev, Yiu, & Hemberg, 2018) onto a  
publicly available and annotated datasets of the human embryonic prefrontal cortex (Zhong et  
al., 2018) and the human adult middle temporal gyrus (Hodge et al., 2019) (Figure 1E). We  
found a high concordance between our annotation and the human brain datasets, despite the  
obvious regional differences.

240

245

250

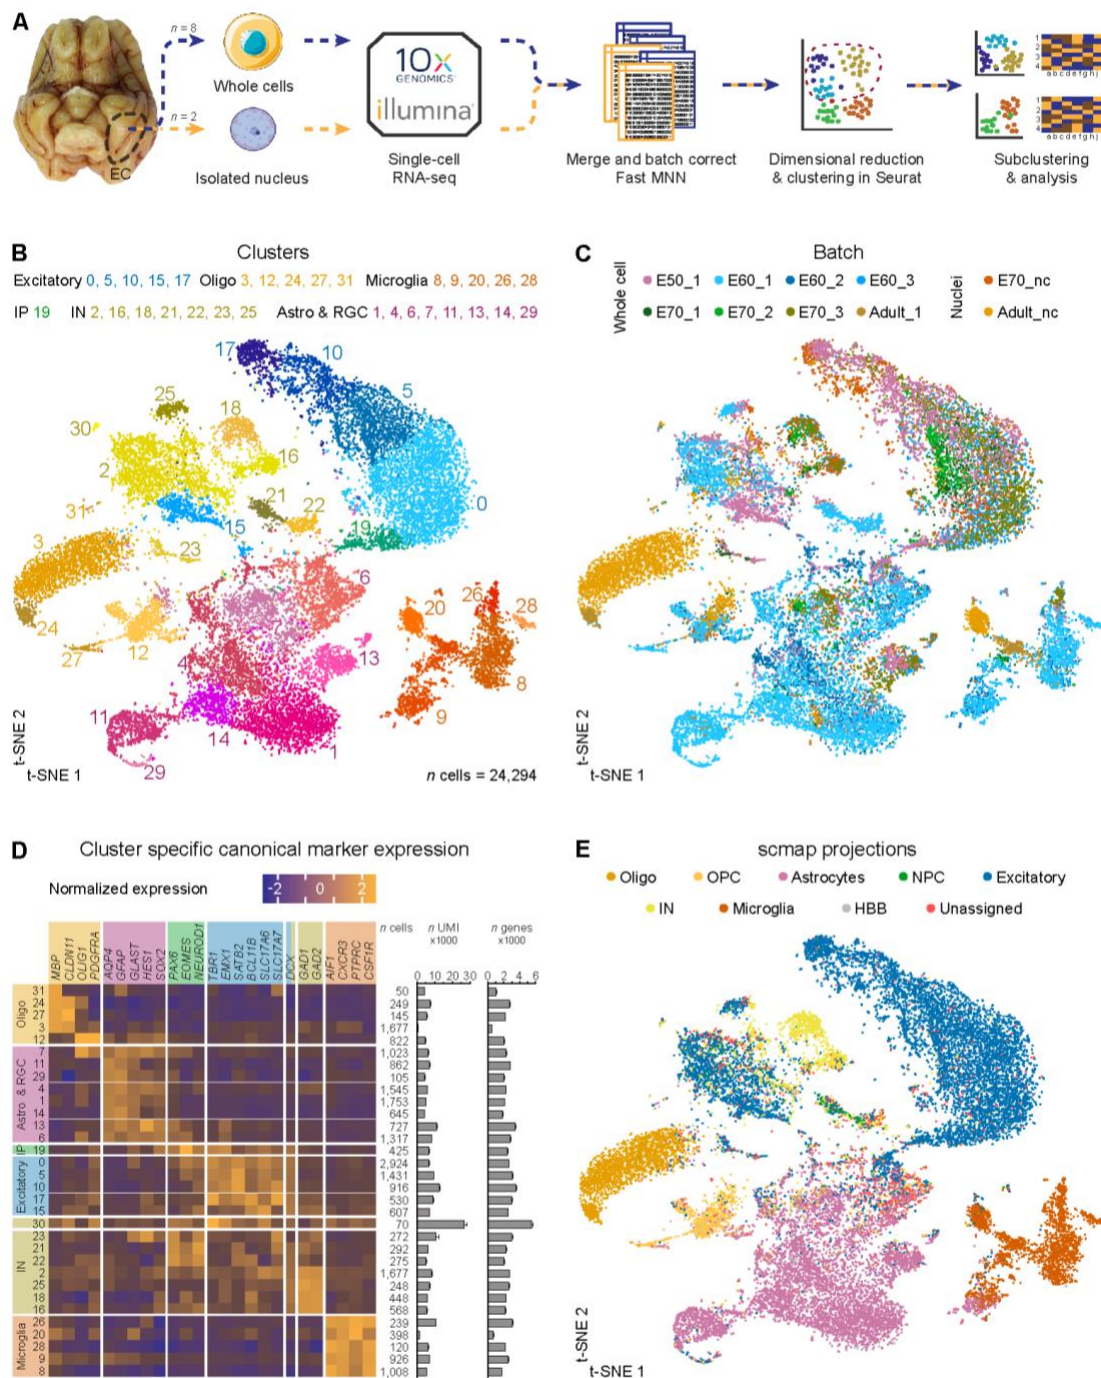

**Figure 1. Single-cell profiling of the entorhinal cortex reveals thirty-two distinct cell clusters of major cell type populations.**

(A) The computational pipeline includes ten batches of single-cell and single-nuclei isolated cells from E50, E60, E70 and P75 which were captured using the 10X genomics platform. Batches were normalized using the Fast MNN approach and dimensional reduction and clustering were performed in Seurat followed by subclustering and analyses of selected clusters. (B) A t-SNE plot of 24,294 cells merged from all timepoints revealed thirty-two distinct populations following FastMNN batch correction. Oligodendro-glia/-cytes (Oligo), astrocytes and radial glia (Astro & RGC), intermediate progenitors (IP), excitatory neurons (Excitatory), interneurons (IN) and microglia (Microglia) (C) tSNE plot annotated by batch demonstrates good integration of subtypes within same ages following correction by FastMNN of the 10 datasets (pre-batch correction shown in Figure S5C). (D) Analysis of canonical marker genes resulted in categorization of several Oligo, Astro & RGC, IP, Excitatory, IN and Microglia clusters. The number (n) of cells, mean UMI counts (unique transcripts) and mean number of different expressed genes for each cluster are also represented. Error bars denote the SD. (E) Projection of the dataset onto an already-annotated human fetal prefrontal cortex and human medial temporal gyrus single-cell dataset consolidates marker gene-driven annotation of the dataset. Abbreviations: NPC, neural progenitor cells; HBB, marker expressed in human blood cells.

## Progenitor and adult interneuron (IN) populations derived from the MGE and CGE are detected in the developing MEC

270 To investigate the temporal emergence of INs within the EC, we sub-clustered a total of 3,498 cells from the dataset using the canonical IN markers, *GAD1* and *GAD2* (clusters 2, 16, 18, 21, 22, 23 and 25) which produced ten subclusters IN0-IN9 (Figure 2A). We included clusters 2 and 25 in our IN analyses even though the scmap projection annotated these two clusters as excitatory neurons (Figure 1D, E). Despite this discrepancy, cluster 25 expressed IN genes, such as *GAD1* and *GAD2* and lacked *SLC17A6/7* and became IN7 after subclustering. For 275 cluster 2 from the main dataset (mainly present at E60), a closer analysis of canonical markers suggested an ambiguous identity as the cells expressed both the excitatory markers, *SLC17A6/7* and IN markers, *GAD1/2* (Figure 1B, D). The UMI counts for this cluster were normal, therefore, it is unlikely to contain doublets. Cluster 2 when subclustered spread across the IN0-IN2 and IN6 populations. Five of the IN populations were only detected during development, 280 suggesting they were IN progenitors (IN1, IN5, IN7, IN8 and IN9). IN1, IN5 and IN7 were detected during earlier embryonic gestation in the pig at E50 and E60, compared to IN8 and IN9 which were detected later, at E70 (Figure 2B). IN5, IN7 and IN8 also clustered further away from the other IN clusters which also suggests they are more transcriptionally distinct than the other IN clusters (Figure 2A). The remaining IN populations, IN0, IN2, IN3 and IN6 285 were all found in the postnatal brain and are likely adult IN populations (Figure 2B). We could identify several well-known IN markers that were either expressed broadly or label specific IN cell subtypes, including, *CALB1*, *DLX1*, *DLX5*, *GAD1*, *GAD2*, *LHX6*, *NPY*, *RELN*, *SST*, and *SOX6*, (Figure 2C). However, we were unable to identify other IN markers, *HTR3A*, *PVALB*, *CCK*, *NOS1*, *LHX5* and *VIP*, likely due to low expression levels and gene dropout effects.

290 Most cortical INs are generated in the ganglionic eminences and are divided in two major classes based on their place of origin: the medial ganglionic eminence (MGE) and caudal ganglionic eminence (CGE) (Gelman & Marin, 2010). The MGE produces PVALB and SST-expressing cortical INs, which account for >60% of all INs in the cortex and the CGE produces 295 a highly diverse group of INs, which in mice express serotonin 5HT3A receptor (Rudy, Fishell, Lee, & Hjerling-Leffler, 2011; Vucurovic et al., 2010) (gene *HTR3A*). However, in human INs, *HTR3A* labels only a minor population of CGE INs (Hodge et al., 2019), which is also likely the case in pigs, since we did not detect robust *HTR3A* expression in our data. Given we could not identify PVALB in our data, we also used other MGE IN markers including *LHX6* (Liodis et al., 2007) and *SOX6* (Batista-Brito et al., 2009) to identify MGE-derived INs. Based on *SST* 300 expression in IN0, IN2 and *LHX6* and *SOX6* in IN3, we assign these clusters as MGE-derived INs (Figure 2C). It was difficult to assign IN6 to either MGE or CGE INs, given an overlapping expression profile but previous research suggests *GRIN3A*, which was highly expressed in this population, is detected in SST INs (Murillo et al., 2021), suggesting IN6 is likely of MGE 305 origin. The progenitor population IN1 also expressed *SST*. Interestingly, both IN0 and IN1 have relatively similar transcriptional profiles. It is likely that these are unique cell populations since IN0 had lower expression of *RELN* and IN1 expressed higher levels of *RAMP3*, *ISG12* and *ACHE* and only IN0 could be detected after E70 of development (Figure 2C). However, further phenotypic profiling is required to conclude that these are separate populations. The remaining 310 clusters had more distinct gene signatures. CGE-derived INs were identified based on expression of Coup TF1 (*NR2F1* gene), CoupTF2 (*NR2F2* gene) (Kanatani, Yozu, Tabata, & Nakajima, 2008) and *NDNF* (Tasic et al., 2018). One population, IN4, expressed *NR2F1* and *NR2F2* and is assigned as a CGE population (Figure 2C). The remaining progenitor populations IN5, IN7-IN9 clusters also expressed these CGE IN markers (Figure 2C).

315



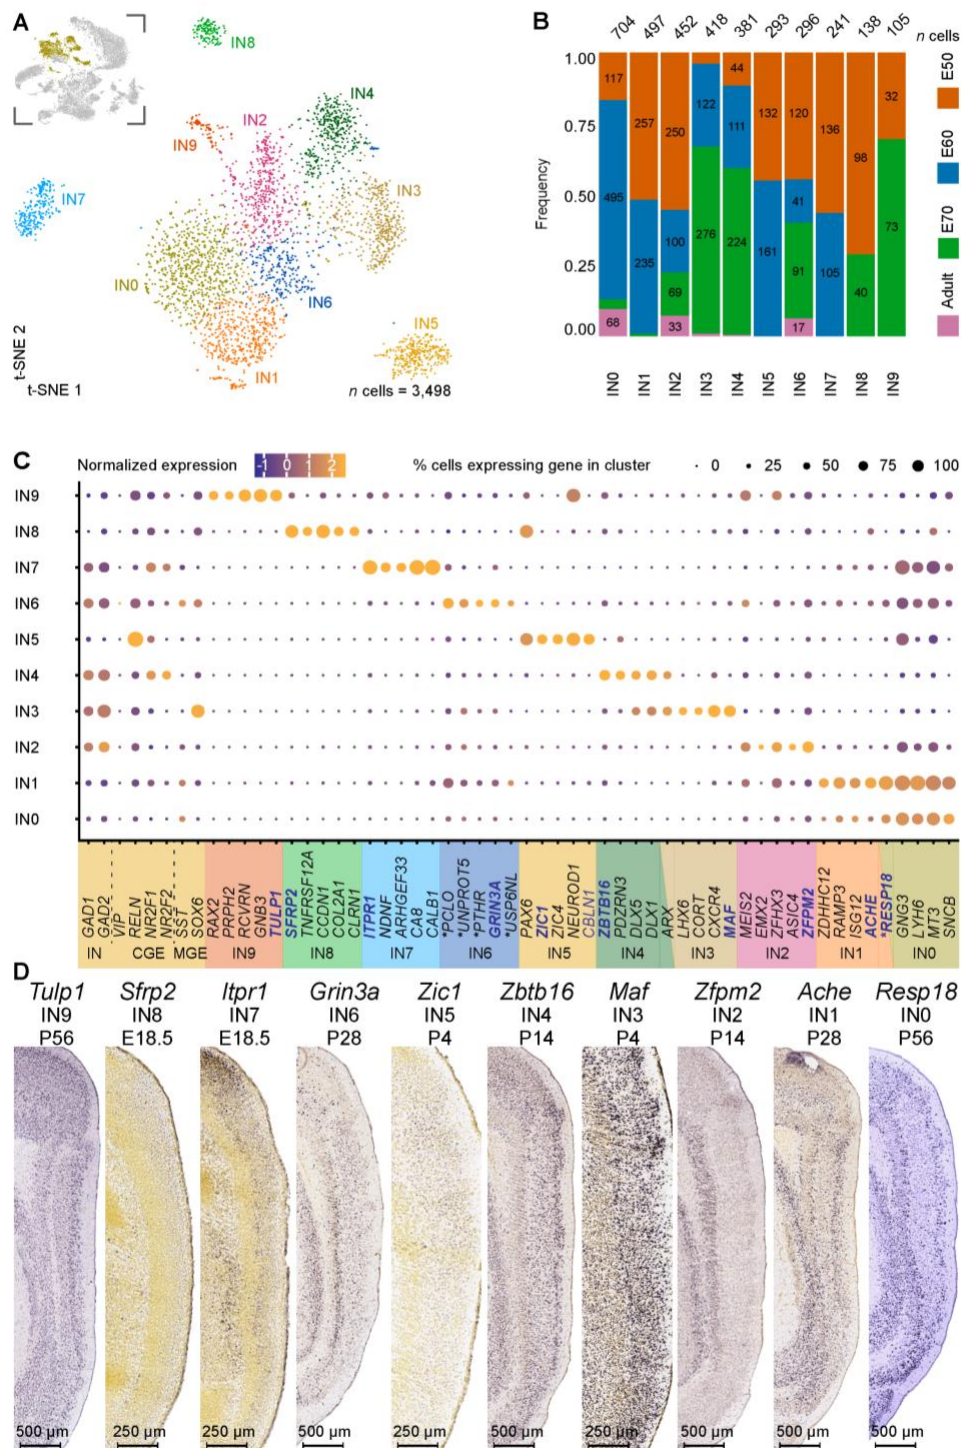

320 **Figure 2. Subclustering of entorhinal cortex (EC) interneurons (INs) reveals ten clusters with unique gene signatures.**  
 (A) A t-SNE plot of the subclustering identifies ten interneuron (IN) clusters with one cluster more transcriptionally distinct  
 than the others. IN clusters highlighted in yellow in the inset image were subclustered from the parent dataset and are depicted  
 in the top left corner. (B) An analysis of the developmental stages across the ten clusters highlights IN1, IN5, IN7, IN8 and  
 IN9 are found exclusively during development and suggestive of IN progenitors and the remaining clusters are adult INs. (C)  
 325 Unique gene signatures were identified for the ten clusters by differential gene expression analysis, together with the population  
 specific expression of canonical markers for interneurons (IN) derived both from the caudal ganglionic eminence (CGE) and  
 the medial ganglionic eminence (MGE). Localization of genes with names in blue are shown in (D). \* marks the human ortholog  
 names (Table S1). (D) Sagittal sections from the ISH datasets from the Allen Developing Mouse Brain Atlas and Allen Mouse  
 Brain Atlas highlight the location of selected markers from the IN clusters across the EC layers in the developing and postnatal  
 mouse brain ("Allen Developing Mouse Brain Atlas," 2008; "Allen Mouse Brain Atlas," 2004; Lein et al., 2007). Image credit:  
 330 Allen Institute. Scale bars: 250 μm (for E18.5, P4 and P14) and 500 μm (for P56).

To investigate the location of the varying IN progenitors and adult populations across the EC layers, we evaluated the expression of unique genes from the clusters in the *in-situ* hybridized EC of the mouse brain from the public databases, the Allen Mouse Brain Atlas (2004) ("Allen Mouse Brain Atlas," 2004; Lein et al., 2007) and the Allen Developing Mouse Brain Atlas (2008) ("Allen Developing Mouse Brain Atlas," 2008). IN0 and IN1 both expressed a gene, *RESP18*, which was localized to the superficial layers and deep layers of the adult mouse EC ("Allen Mouse Brain Atlas," 2004) (Figure 2D), suggesting these INs are not located in the middle cortical layers. In addition *ACHE* was upregulated in IN1 and also found in the superficial and deep layers, confirming the location of at least the IN1 neurons in the mouse EC (Figure 2D). *ZIC1*, *ITPR1*, *SFRP2* and *TULP1* were expressed in the IN progenitor populations IN5, IN7, IN8 and IN9, respectively and were distributed across the layers of the developing and postnatal EC mouse brain. *ZFPM2* was upregulated in IN2 and found only in the deeper layers (Figure 2D). *MAF* and *ZBTB16* were unique upregulated genes in IN3 and IN4, respectively and were expressed across all the EC layers, however, *ZBTB16* was also upregulated in the superficial layers suggesting potential high abundance of IN4 CGE INs in the superficial layers. (Figure 2D). *GRIN3A* was uniquely expressed in IN6 and detected across the layers but also upregulated in the deeper layers of the MEC suggesting different localization of these INs between the MEC and LEC (Figure 2D). In sum, we identified five IN progenitor populations (IN1, IN5, IN7-IN9), four adult IN MGE populations (IN0, IN2, IN3, IN6), and one IN CGE population (IN4).

### **Single-cell RNA sequencing analysis reveals that OPCs emerge in the early EC.**

We then assessed the oligodendroglia populations within the EC, which consisted of oligodendrocyte progenitor cells (OPCs) and oligodendrocytes at various stages of maturation. Subclustering and subsequent analyses were performed on clusters 3, 12, 24, 27 (Figure 3A insert). Five distinct clusters were identified from the subclustering (Figure 3A-C). Two clusters (OPC1 and 2) expressed OPC markers *PDGFRA* and *OLIG1* (Figure 3C), with a large proportion of the cells undergoing cell cycle division (50% and 25% respectively, Figure 3D). We were unable to identify *OLIG2* in these two clusters, likely due to low copy numbers and subsequent gene dropout effects. However, this data suggested these two clusters were progenitor cells. Cluster OPC1 was composed of mostly fetal cells from E50 to E70 whilst cluster OPC0 was detected both during gestation and postnatally (Figure 3B). OPC0 and OPC1 are clearly two separate populations, as both populations are detected after birth, albeit the clustering suggests a larger population of OPC0 after birth. Several genes have been previously identified in OPCs. For example, cluster OPC0 expressed the genes *LHFPL3* and *MMP16*, and cluster OPC1, *STMN1*; previously identified in rodent OPCs (Artegiani et al., 2017; Hu et al., 2011; Lin, Mela, Guilfoyle, & Goldman, 2009; Magri et al., 2014). To characterize whether these clusters resided in spatially different niches, we examined their unique gene signatures in the EC from the Allen Mouse Brain Atlas and Allen Developing Mouse Brain Atlas ISH datasets ("Allen Developing Mouse Brain Atlas," 2008; "Allen Mouse Brain Atlas," 2004; Lein et al., 2007). We detected *Cntn1* (a marker previously identified in OPCs (Lamprianou, Chatzopoulou, Thomas, Bouyain, & Harroch, 2011)) from OPC0 in the superficial layers in the developing mouse EC (E18.5) and at a later time point across all cell layers, at P28 in the mouse EC ("Allen Developing Mouse Brain Atlas," 2008; "Allen Mouse Brain Atlas," 2004) (Figure 3E). We detected the OPC1 marker *Hmgbl* (also previously identified in OPC progenitors (Nicaise et al., 2019)) across all EC cell layers in the postnatal P4 and P28 and adult mouse EC ("Allen Developing Mouse Brain Atlas," 2008; "Allen Mouse Brain Atlas," 2004) (Figure 3E) showing the gene as expressed even later, after birth.



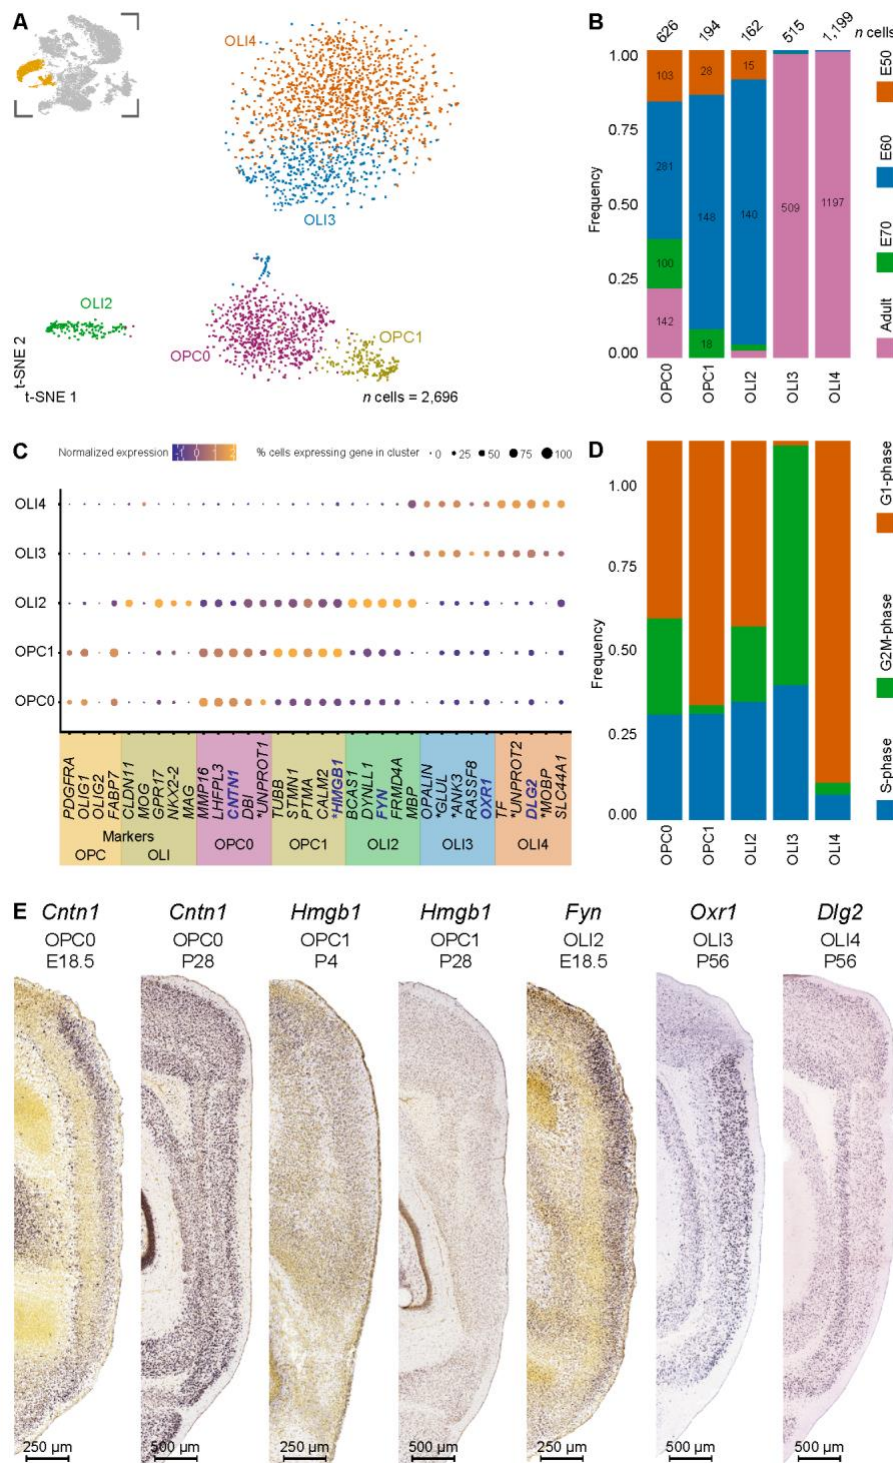

385

390

**Figure 3. Subclustering of oligodendrocytes and -glia reveals oligodendrocyte progenitor cells (OPCs) emerge in the early entorhinal cortex.** (A) Visualization of the oligodendroglia subset (number (n) of cells = 2,696) shows five clusters in a t-SNE plot. Oligodendroglia clusters highlighted in orange in the inset image were subclustered from the parent dataset and are depicted in the top left corner. (B) The developmental stages of the oligodendroglia visualized by a bar plot highlight a distinct adult and fetal populations and populations that exist both during development as early as E50 and postnatally. (C) Canonical lineage markers and unique gene signatures for the five clusters were identified by differential gene expression analysis. Localization of genes with names in blue is shown in (E). \* marks the human ortholog names (Table S1). (D) Distribution of cells within different cell cycle phases highlights OLI4 is largely a non-mitotic population and the remaining clusters are mitotically active. Note, G1-phase is indistinguishable from the G0-phase. (E) Sagittal sections from the ISH datasets from the Allen Developing Mouse Brain Atlas and Allen Mouse Brain Atlas ("Allen Developing Mouse Brain Atlas," 2008; "Allen Mouse Brain Atlas," 2004; Lein et al., 2007) highlight the location of selected markers from the OPC and OLI subtypes. Image credit: Allen Institute. Scale bars: 250  $\mu$ m (for E18.5 and P4) and 500  $\mu$ m (for P28 and P56).

395 Interestingly, our data revealed an additional population, OLI2, that was constituted  
predominantly of fetal cells from E60 OLI2 (Figure 3A-B). These cells surprisingly also  
expressed the mature oligodendrocyte markers, *MBP*, *CLDN11*, *GRP17*, *NKX2-2*, and *MAG*  
(Figure 3C). Together, this data suggests that a small population of myelinating  
400 oligodendrocytes might be present in the fetal porcine EC already at E60. The oligodendrocyte  
clusters OLI3 and OLI4 consisted almost exclusively of adult cells and were highly similar in  
profile (Figure 3B, C). We speculate these to be mature myelinating oligodendrocytes. Nearly  
all the OLI3 cells expressed G2M/S-phase cycling genes while OLI4 cells were mostly  
quiescent and expression genes from the G0/1-phase of the cell cycle (Figure 3D). In the Allen  
Developing Mouse Brain Atlas, expression of the OLI2 specific marker *Fyn* showed  
405 predominant expression in the upper layers of the developing E18.5 mouse EC ("Allen  
Developing Mouse Brain Atlas," 2008) (Figure 3E). In the Allen Mouse Brain Atlas, the OLI3  
unique gene marker, *Oxr1*, was expressed in LI-III of the adult mouse EC while the OLI4  
unique gene marker, *Dlg2*, was found in the deep layers ("Allen Mouse Brain Atlas," 2004)  
(Figure 3E-F). In summary, our data indicate the presence of 2 OPC populations that may  
410 populate different layers of the EC, with one pre-myelinating oligodendrocyte population and  
two mature oligodendrocyte profiles with similar profiles.

### Single-cell RNA sequencing reveals unique gene signatures for stellate cells and pyramidal neuron populations

415 To gain a deeper understanding of the temporal pattern of emerging neurons we performed  
subclustering on the IP and excitatory neuron populations identified from the parent dataset and  
uncovered unique gene expression signatures. We subclustered and analyzed a total of 6,833  
cells, including the excitatory clusters 0, 5, 10, 15, and 17 and the IP cluster 19. Figure 4A,  
420 insert). The subclustering revealed ten distinct populations (Figure 4A). Cells from the  
gestational stages dominated the subset of IPs and excitatory neurons, with only very few adult  
cells represented (Figure 4B). This is due to the fact that we captured mostly glia in the postnatal  
brain samples. Amongst the clusters, one population exhibited a typical IP identity. Cells in  
cluster IP4 expressed the typical IP markers *EOMES*, *SOX2*, and *NEUROD4* (Figure 4C)  
425 (Pollen et al., 2015) and could be detected across all stages of development, but also in the  
postnatal brain suggestive of ongoing postnatal neurogenesis (Figure 4B). IP8 was a detected  
only during the neurogenesis period (E50-E60) (Liu et al., 2021) and expressed typical neural  
progenitor markers including, *PAX3* (Blake & Ziman, 2014), *DBX1* (Lacin, Zhu, Wilson, &  
Skeath, 2009) and the ventral midbrain progenitor marker *OTX2* (Puelles et al., 2004). When  
430 referring to the Allen Developing Mouse Brain Atlas ISH dataset ("Allen Developing Mouse  
Brain Atlas," 2008), the E18.5 mouse EC showed expression of a unique marker *Cxcr4*, across  
all the layers (Figure S2). *Pax3* at P4 and *Dbx1* at P14 are observed expressed in the superficial  
layers (Figure S2) suggesting that the IP8 population consists of superficial neuron progenitors.

435 An analysis of canonical genes for immature neurons with a pyramidal-like identity revealed  
five clusters. Clusters PYR0, PYR1, PYR2, PYR3 and PYR5 were tangentially located on the  
t-SNE plot (Figure 4A) and expressed low levels of *RELN* (Figure 4C). Surprisingly, we did  
not observe in our dataset any neuron populations expressing *CALB1*, a common pyramidal  
neuron marker reported in rats, mice and humans within the EC (Beall & Lewis, 1992;  
440 Diekmann, Nitsch, & Ohm, 1994; Fujimaru & Kosaka, 1996). *CALB1* may not be a suitable  
marker for pyramidal neurons in the pig EC as a previous study has reported the absence of  
expression in pyramidal neurons in the hippocampal region (Holm, Geneser, Zimmer, &  
Baimbridge, 1990). Clusters PYR0 and PYR1 shared similar transcriptional profiles but  
diverged in *NEUROD1* expression. Clusters PYR2 and PYR3 were also similar, but had



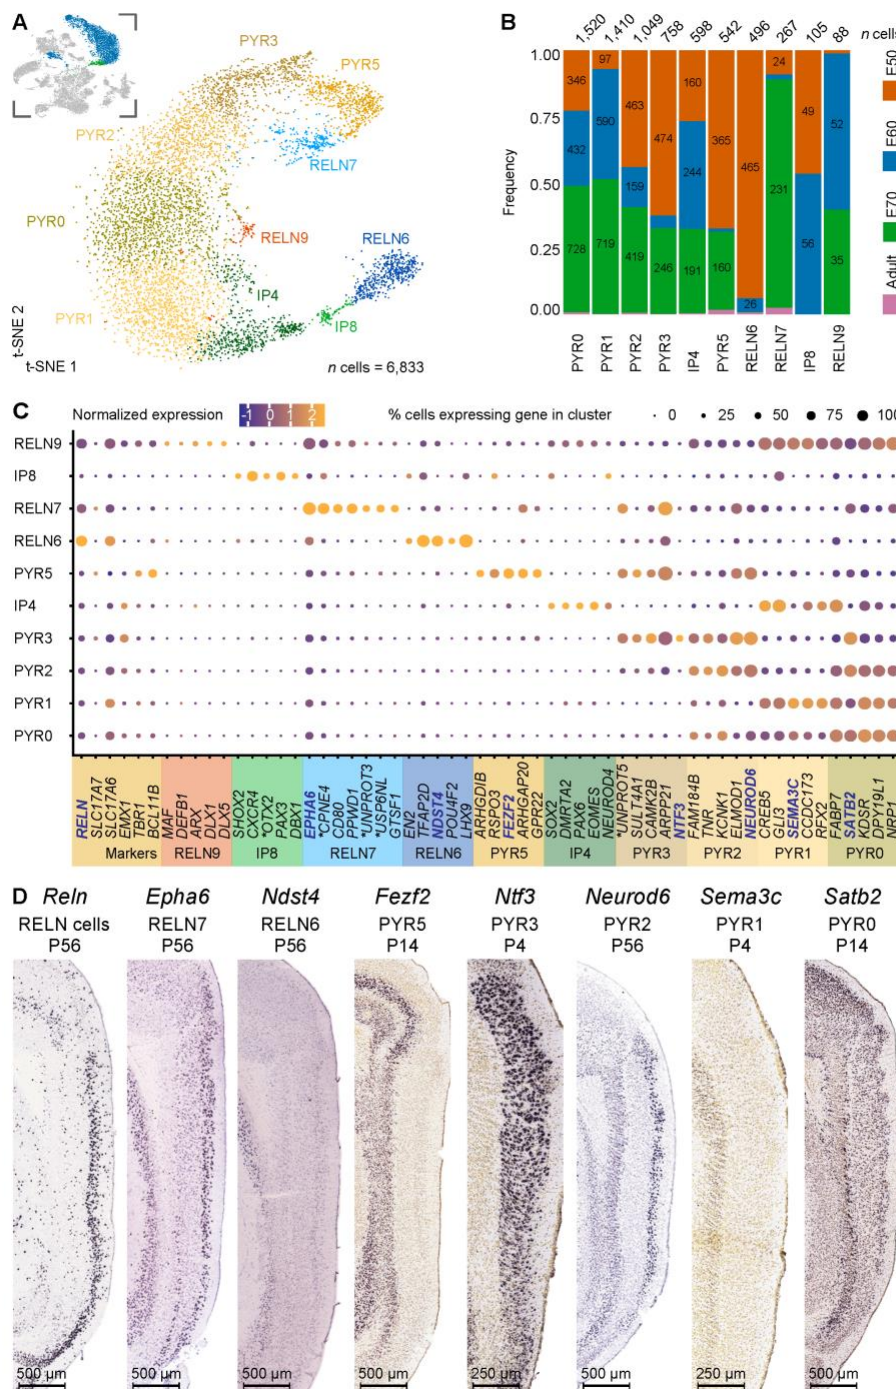

445

**Figure 4. Subclustering of the excitatory neurons and intermediate progenitors of the developing entorhinal cortex (EC) highlight three *RELN*+ clusters and five pyramidal neuron clusters.** (A) A t-SNE plot highlights subclustering of excitatory neurons and intermediate progenitors (number (n) of cells = 6,833) results in ten distinct clusters. The inserted image shows the excitatory neuron clusters highlighted in blue and intermediate progenitors in green, that were subclustered from the parent dataset.

450

(B) Distribution of developmental stages within the ten clusters highlights five populations persist postnatally (three pyramidal neurons, PYR0, PYR2, PYR5 and two Reelin+ cell populations, RELN6, RELN7). Three IP populations were identified IP4, IP8 and RELN9 which the latter also expressed IN markers and RELN. IP4 was also detected postnatally but expressed IP makers *EOMES*, *PAX6* and *SOX2* (C) Unique gene signatures for the ten clusters were determined following differential gene expression analysis. Localization of genes with names in blue are shown in (D). \* marks the human ortholog names (Table S1).

455

(D) Sagittal sections from the ISH datasets from the Allen Developing Mouse Brain Atlas and Allen Mouse Brain Atlas highlight the location of selected markers from the RELN and PYR clusters across the EC layers at different developmental stages and in the adult ("Allen Developing Mouse Brain Atlas," 2008; "Allen Mouse Brain Atlas," 2004; Lein et al., 2007). Image credit: Allen Institute. Scale bars: 250 μm (for E18.5 and P4) and 500 μm (for P56).

460 divergent *ARPP21* expression. Only PYR1 and PYR3 could be detected in the prenatal brain  
and not in the postnatal brain. Given the similar profiles, it is likely that PYR0, PYR2 and PYR5  
465 are adult populations. This does not explain however why all five populations are identified  
during early development, so we cannot eliminate the possibility that these are potentially  
different pyramidal neurons. Therefore, we deduce to have captured at least three pyramidal  
470 neuron populations. An analysis of mature pyramidal neuron markers only partially confirmed  
the notion of maturation of PYR1, PYR3 and PYR5, as *SLC17A6/7* (vGLUT1/2 genes)  
expression was observed in PYR0 and PYR2 but not PYR5 (Figure 4C). Validation of two  
unique gene markers in the Allen Developing Brain Mouse Atlas ("Allen Developing Mouse  
475 Brain Atlas," 2008) corroborated the putative location of these cells. The gene *TNR* is highly  
expressed in PYR2 and PYR3 and was found in the superficial layers of the mouse EC (Figure  
S2). The gene *NEUROD6* was highly upregulated in PYR2, PYR3 and PYR5 and can be  
detected in both the superficial and deeper layers. Our investigations of the pig EC show  
*BCL11B* is expressed both in LII and LV of the EC (Liu et al., 2021)) and we found *BCL11B*  
480 to be highly upregulated in PYR5 suggesting that cluster PYR5 may reside in both the  
superficial and deep layers. Taken together, we have identified five pyramidal neuron subtypes  
during development and at least three mature pyramidal neuron types in the postnatal EC that  
are uniquely placed across the EC layers.

480 In addition to the pyramidal neurons, the EC harbors two types of principal neurons expressing  
Reelin. These are the stellate and fan cells that reside in LII/III in the MEC and LEC,  
respectively (Witter et al., 2017). Our subclustering analysis of the MEC revealed three distinct  
neuron populations that expressed *RELN* (*RELN6*, *RELN7* and *RELN9*), two of which were  
485 present postnatally (*RELN6* and *RELN7*) (Figure 4 A,B). Apart from the known expression of  
Reelin and absence of *CALB1* (at least in a proportion of Reelin neurons), few other genes are  
known to be expressed in these cells (Fuchs et al., 2016; Kitamura et al., 2014; Winterer et al.,  
2017). *RELN9* was only present during gestation (mostly at E60-E70) (Figure 4B) and clustered  
closely to PYR0 and IP4. It expressed *DLX1*, *DLX5* and *ARX* (Figure 4A-C), together with  
490 *GADI2* (Figure S1B), suggesting it has more of a GABAergic IN progenitor (Friocourt &  
Parnavelas, 2011; Pla et al., 2018; Y. Wang et al., 2010)-like identity and we deduce this not to  
be a reelin excitatory neuron.

This left us with clusters *RELN6* and *RELN7*, which lacked the pyramidal transcription factor,  
*EMX1*(Chan et al., 2001) (Figure 4C). These two clusters were expressed throughout all  
495 sampled time points and persisted in the postnatal adult brain (Figure 4B). They had distinct  
transcriptional profiles and were distinctly separated on the t-SNE plot (Figure 4A, B).  
Interestingly, *RELN6* cells are more abundant than *RELN7* cells at E50 suggesting that  
more of this *RELN* subtype is born during early neurogenesis (Figure 4B). In contrast,  
more *RELN7* cells were captured at E70 (late neurogenesis in the pig (Liu et al., 2021))  
500 than *RELN6* cells (Figure 4B). When assessing unique markers from these clusters in the Allen  
mouse atlases, the *RELN6* uniquely identified gene, *Lhx9*, was expressed across all the EC  
layers but also across the parahippocampal cortex at E18.5 and P14 in the mouse ("Allen  
Developing Mouse Brain Atlas," 2008) (Figure S2). This marker is known to be expressed in  
Reelin negative (-) pioneer neurons across the cortex (Bertuzzi et al., 1999) and is therefore not  
505 an ideal marker for identifying the *RELN6* SC within the MEC alone. In the Allen Developing  
Mouse Brain Atlas, another marker, *Ndst4* was expressed at higher levels in the superficial  
layers at P56 in the mouse EC ("Allen Developing Mouse Brain Atlas," 2008) (Figure 4D)  
which indicates their location within the superficial layers. When assessing genes from cluster  
*RELN7* in the Allen Developing Mouse Brain Atlas, moderate levels of *Reln* and *Cpne4*, which

510 are both expressed in the superficial layers of the mouse EC and were more enriched in the  
LEC than the MEC LII ("Allen Developing Mouse Brain Atlas," 2008) (Figure 4C, D). Further,  
*Epha6* was upregulated in cluster RELN7 and could be observed in the LII-LIII in the Allen  
Mouse Brain Atlas ("Allen Mouse Brain Atlas," 2004), confirming the RELN7 neurons are also  
515 located in the superficial layer. To sum, two *RELN* excitatory neuron populations were  
identified which persisted after birth.

### Induced expression of six transcription factors in human iPSCs results in stellate cell-like progenitors

520 The Reelin+ SCs are a vulnerable cell population in the EC (Kobro-Flatmoen et al., 2016; Leng  
et al., 2021) and would be an interesting cell type to model in-vitro for studying AD. We sought  
to use our scRNA-seq data to produce a novel protocol for the production of SCs from  
pluripotent stem cells by induced overexpression of SC specific transcription factors.  
525 Therefore, looked for candidate TFs among the twenty most enriched TFs in the two *RELN*  
populations based on the TFcheckpoint list of DNA-binding RNA polymerase II TFs curated  
by Chawla *et. al* (Chawla, Tripathi, Thommesen, Laegreid, & Kuiper, 2013) using the  
Findmarkers tool in Seurat (Figure 5A). We focused our attention on the RELN7 cluster, given  
it represented a mature SC profile that was located in the superficial layers of the EC. *RORB*  
530 was found to be one of the twenty differentially expressed TFs, and it has recently been  
identified as a marker for vulnerable EC excitatory neurons (Leng et al., 2021). Of the 20 TFs  
we focused on six, *RUNX1A1*, *SOX5*, *FOXP1*, *MEF2C*, *TCF4* and *EYA2* based on a literature  
search showing prominent roles for these TFs in neurodevelopment and differentiation.  
*Runx1t1* is specifically expressed in neurons and plays a role in hippocampal neuron  
535 differentiation (Linqing et al., 2015; Zou, Li, Han, Qin, & Song, 2020), which also lies in close  
proximity with the EC within the ventral telencephalon and both structures arise from the  
medial pallium (Abellan, Desfilis, & Medina, 2014). *Eya2* is expressed in neural progenitors  
and is repressed by *Foxg1* during corticogenesis, playing an important role in neuronal  
differentiation (Kumamoto et al., 2013). *Foxp1* is co-expressed with *Satb2* and detected in LIII-  
540 LVa neurons (Hisaoka, Nakamura, Senba, & Morikawa, 2010). It is also implicated in neural  
stem cell differentiation and neuronal morphogenesis (Braccioli et al., 2017; X. Li et al., 2015).  
We recently demonstrated that MEC SC express *SATB2* which further raised our interest in  
*FOXP1* (Liu et al., 2021). *SATB2* was also detected in both RELN7 and RELN9 (Figure 4C).  
*SOX5* is an important regulator of early-born deep layer neurons (Kwan et al., 2008) and in  
545 differentiation of specific corticofugal neuron subtypes (Lai et al., 2008) but may be involved  
in SC fate given they also express the deep layer marker, *BCL11B* (Liu et al., 2021). *BCL11B*  
was also upregulated in the RELN7 population and more so than RELN6 (Figure 4C). *Tcf4* is  
expressed in cortical and hippocampal neurons, highly enriched in the pallial region (Kim,  
Berens, Ochandarena, & Philpot, 2020) and is involved in neurogenesis, neuronal  
550 differentiation and hippocampal formation (Hill et al., 2017; Mesman, Bakker, & Smidt, 2020;  
Schoof et al., 2020). It is also implicated in memory and spatial learning (Kennedy et al., 2016).  
*Mef2c* plays a role in neuronal development and is expressed in hippocampal neurons (Adachi,  
Lin, Pranav, & Monteggia, 2016). It is also implicated in cognitive learning, including working  
memory and object recognition (Mitchell et al., 2018). An assessment of these genes in the  
555 mouse brain ISH data from the Allen Mouse Brain Atlas demonstrated that both *Tcf4* and *Mef2c*  
are expressed in the superficial layers of the EC, whereas the remaining genes were expressed  
across all the layers ("Allen Mouse Brain Atlas," 2004) (Figure 5B). The sequences of these six  
TFs were also available from Addgene and cloned into plasmids from either mouse (*Foxp1*,  
*Sox5*) or human (*TCF4*, *MEF2C*, *RUNX1T1*, *EYA2*) RNA.



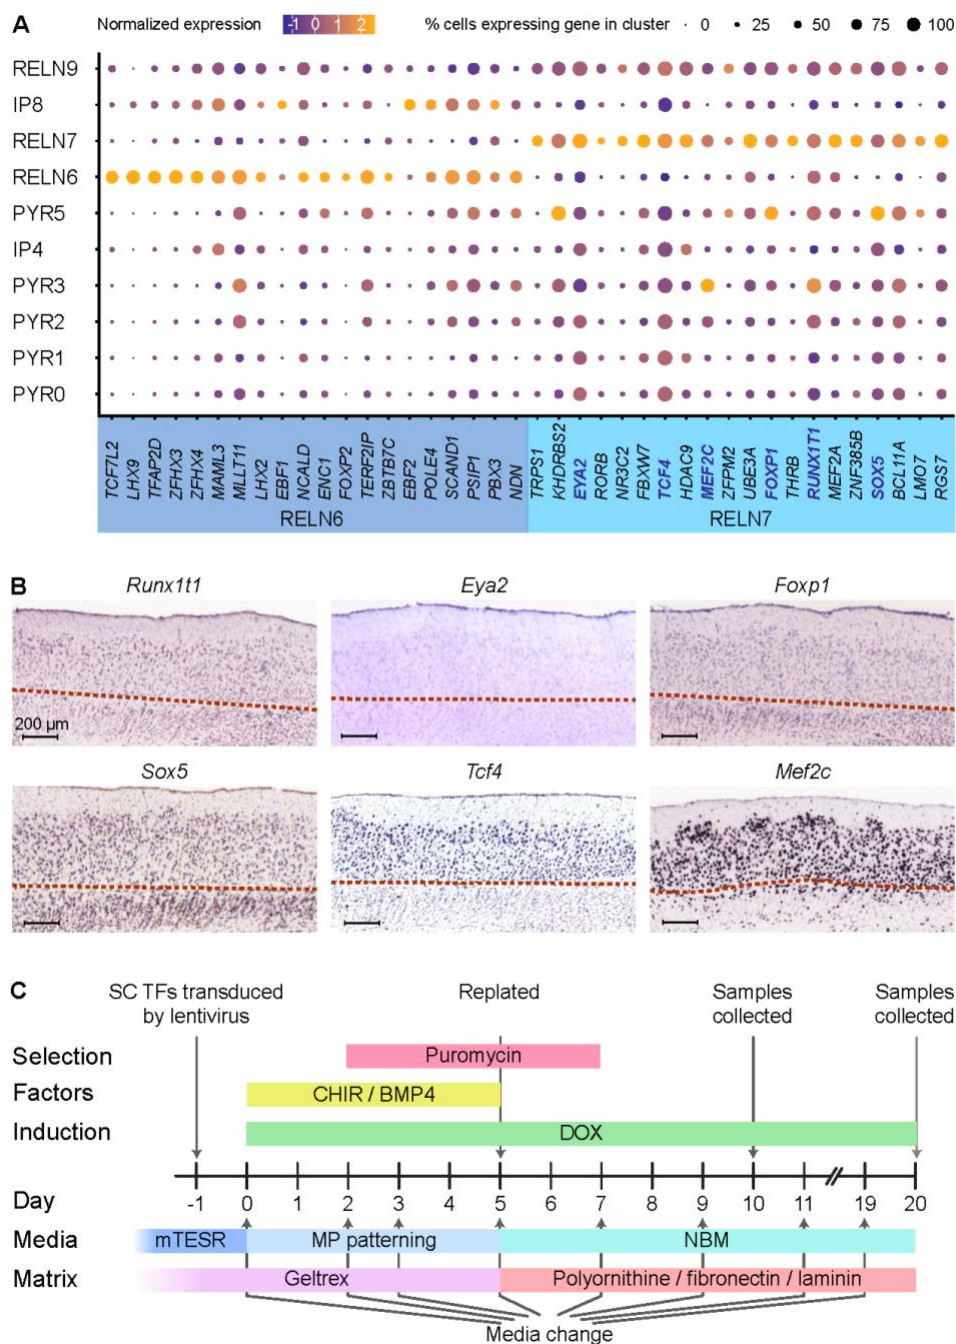

560

**Figure 5. Unique transcriptional factors upregulated in RELN positive clusters. (A)** Expression of the top twenty enriched transcription factors (TFs, x-axis) were identified for each of the RELN-positive and putative stellate cell (SC) populations (RELN6, 7) and are visualized across the identified progenitor and excitatory neuron populations (y-axis) in the developing EC. The selected genes for reprogramming induced pluripotent stem cells (iPSCs) are highlighted in blue within the RELN7 cluster. **(B)** The laminar expression of the six SC highlighted TFs (*Runx1t1*, *Eya2*, *Foxp1*, *Sox5*, *Tcf4*, and *Mef2c*) was investigated by ISH in sagittal sections of the publically available Allen Mouse Brain Atlas ("Allen Mouse Brain Atlas," 2004; Lein et al., 2007). Image credit: Allen Institute. The red dotted lines demarcate the lamina dissecans. **(C)** Schematic diagram of the protocol used for directly reprogramming iPSCs into SCs using the selected TFs, including timing of media and matrix change, transfection, gene induction (using DOX), addition of patterning factors (CHIR 99021 and BMP4), and collection of samples. Abbreviations: Doxycycline (DOX); pluripotent stem cell media (mTESR); neurobasal medium with medial pallium patterning factors (MP patterning); neurobasal medium for maintenance of neurons (NBM).

565

570

575

In order to produce SC from human iPSCs, we applied an overexpression approach in combination with culture conditions that induced a medial pallial fate. Evidence suggests the MEC is derived from the medial pallium (Abellan et al., 2014; Bruce & Neary, 1995; Desfilis, Abellan, Sentandreu, & Medina, 2018). We also tested whether Ngn2 was necessary in the direct programming approach since Chen *et al.* have demonstrated that patterning neurons with specific factors in combination with ectopic Ngn2 expression yielded a more uniform population with a specific CNS fate (Chen et al., 2020). We performed lentiviral transduction in the human iPSC lines, SFC 180-01-01 (SFC) and WTSli024A (WTS) using different combinations of lentiviruses expressing the TFs in the presence or absence of Ngn2 (applying a leave-one-out approach in the presence of Ngn2) and cultured the transduced cells in CHIR and BMP4 for 5 days (Figure 5C). Puromycin selection was initiated on day (D)2 and continued 5 days to eliminate non-transduced cells. The cells were re-seeded on D5 and propagated in neuronal medium for up to a further 15 days (total 20 days) (Figure 5C). We also included a negative control where the human iPSCs were not transduced with TFs. We determined that these cells were unable to differentiate into a neuronal fate in the medial pallial culture conditions alone (Figure 6). As to be expected, the Ngn2 alone treatment resulted in neuronal morphology at D10 and D20, as has been described previously (Y. Zhang et al., 2013). The combination of the six SC TFs in the presence of Ngn2 also resulted in neurons with axonal projections at D20 (Figure 6A). However, this was only observed in the SFC line, and pronounced cell death was observed in the WTS cell line, which might be attributed to cell line-specific toxicity. Strikingly, the combination of the six SC TFs in the absence of Ngn2 resulted in bipolar cells at D10, and at D20 a more neuron-like morphology was observed (Figure 6A). The leave-one-out SC TF approach in the presence of Ngn2 also resulted in neurons with extending dendrites at D20 (Figure S3A). By morphological observation alone, we were not able to exclude the contribution of any particular, or combinations of SC TF in directing a neuronal fate in the presence of Ngn2.

In order to further elucidate the identity of the neurons produced, we investigated the expression of known SC markers, *BCL11B*, *SATB2*, *RELN*, and genes upregulated in the MEC LII, *LEF1* and *LHX2* (Abellan et al., 2014; Hebert, Mishina, & McConnell, 2002; Liu et al., 2021; Medina, Abellan, & Desfilis, 2017) in the cells reprogrammed with all six SC TFs with or without Ngn2, compared to Ngn2 alone, at D10 and D20. We selected *BCL11B* since we have determined earlier that most earlyborn SC are *BCL11B*<sup>+</sup> (Liu et al., 2021), however other SC populations are *BCL11B*<sup>-</sup>. The qPCR confirmed expression of *BCL11B* in all three treatments, but the highest levels of expression were observed in the Ngn2-only induced cells (Figure 6B). A significant increase in *SATB2* expression was also observed in all three treatments, but was highest in the Ngn2-only neurons (Figure 6B). Interestingly, a significant increase ( $p < 0.001$ ) in *RELN* expression was observed only in the cells induced with expression of the SC TFs alone (Figure 6B). Together, the SC TFs induced co-expression of *BCL11B*, *SATB2*, and *RELN*, mirroring the unique molecular profile of EC SCs. To rule out a pyramidal neuron identity we analyzed the cells for *CALB1*. Of interest, was a high expression of the pyramidal marker, *CALB1* in the cells induced with the SC TFs alone. This was unexpected, as only a smaller subpopulation of entorhinal SCs, the intermediate SCs, express both Reelin and Calbindin (Witter et al., 2017). Further, *LEF1* was upregulated in both treatments containing SC TFs but not in the Ngn2 alone treatment (Figure 6B). In contrast, *LHX2* was only upregulated in the Ngn2-only treatment. The analyses indicate the SC TFs were able to induce the expression of *BCL11B*, *SATB2*, *RELN*, *CALB1* and *LEF1* in the human iPSCs derived neurons by D20. To further determine a SC glutamatergic identity, we assessed the iPSC-derived cell populations at D10 and D20 for expression of *BCL11B*, Reelin, and vGLUT1 by performing immunocytochemistry. Interestingly, none of the neurons from the different treatments expressed Reelin or vGLUT1 (data not shown). The absence of Reelin was not surprising since

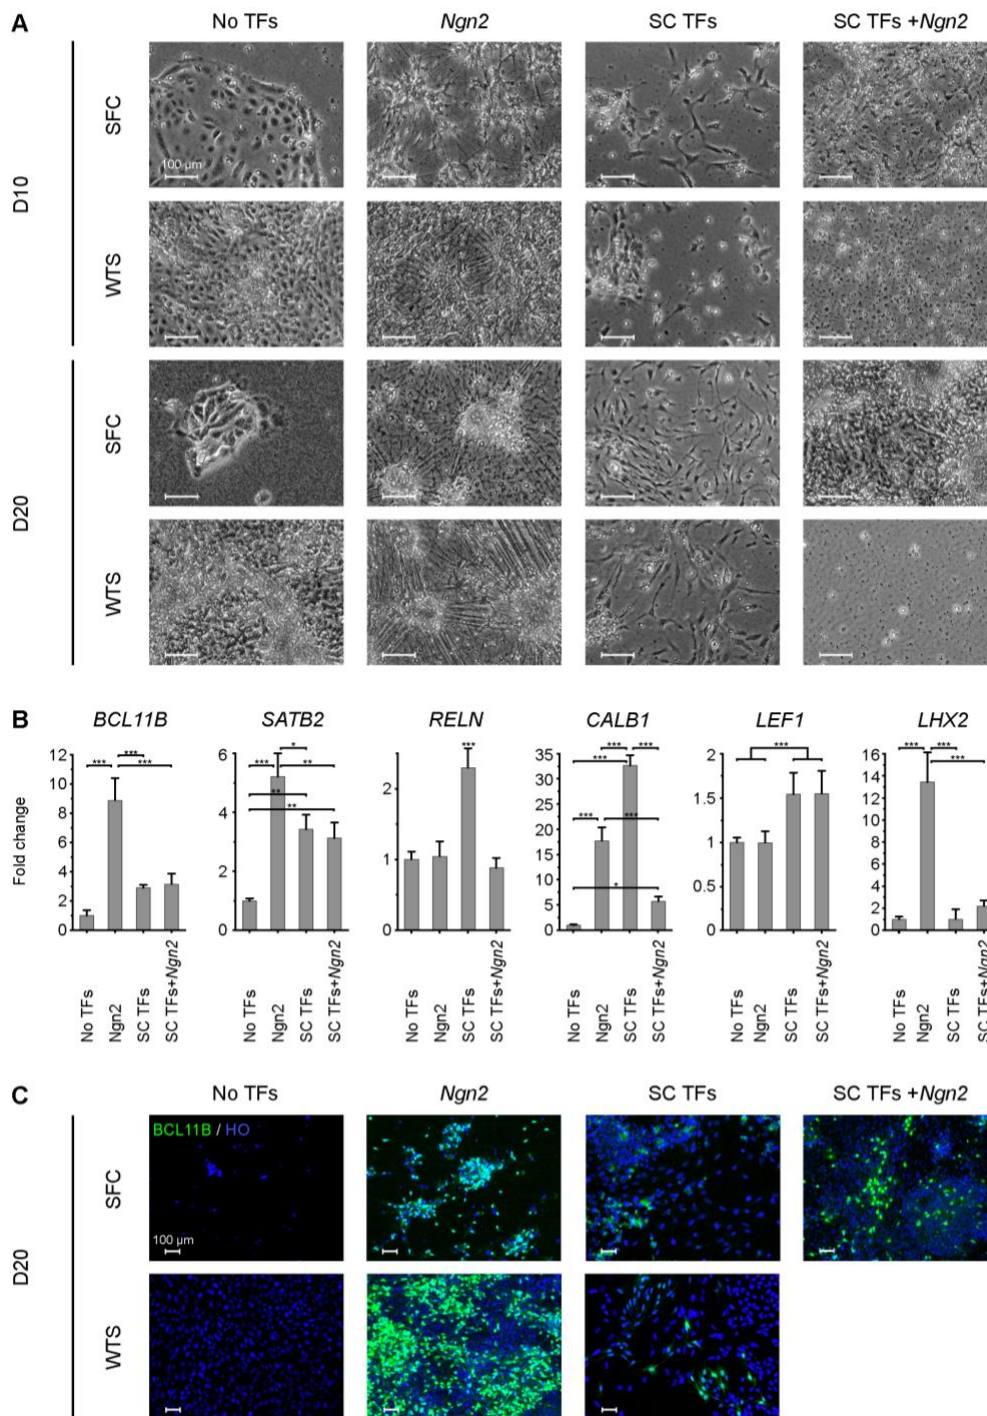

**Figure 6. Direct reprogramming of induced pluripotent stem cells (iPSCs) results in the production of stellate cell-like cells.** (A) The morphological changes of the two iPSC lines SFC 180-01-01 (SFC) and WTSli024A (WTS) are shown after transduction with the stellate cell transcription factors alone (SC TFs), the SC TFs plus *Ngn2*, *Ngn2* alone and without any TFs at Day (D)10 and D20 post transduction. Scale bar: 100  $\mu$ m. (B) RT-qPCR analysis of pooled D10 and D20 samples highlights upregulated expression of *RELN*, *SATB2*, *CALB1* and *LEF1* in SC TF transduced iPSCs compared with iPSCs not transduced with any TFs. Expression values were normalized to *GAPDH* and presented as fold-change relative to No TFs. Bars represent the mean values of three replicates. The error bars represent the SD. Statistical one-way ANOVA, with Tukey's multiple comparisons test was performed and significance is reported as: \* $p < 0.05$ , \*\* $p < 0.01$ , \*\*\* $p < 0.001$ . (C) Expression of *BCL11B* was determined in the transduced SFC and WTS iPSCs, including the SC TFs alone treatment, at D20. HO; Hoechst. Scale bar: 100  $\mu$ m.

630

635



640 expression of this gene is switched on later in development. However, BCL11B expression was observed in cells transduced with Ngn2, SC TFs and Ngn2 and SC TFs alone, at D20 (Figure 6C) and as early as D10 in the WTS line (Figure S3B). This observation indicates that the SC TFs alone were able to induce BCL11B expression in cells with neuronal morphology. Omission of one of the six SC TFs in the presence of Ngn2 also resulted in BCL11B expression in the cells (Figure S4). To sum, the SC TFs alone were able to differentiate human iPSCs into  
645 SC-like cells with neuronal processes and several unique SC markers. Further, *RELN* was only detectable at the RNA level which suggests an immature neuronal phenotype given the lack of vGLUT1 expression.

## 650 Discussion

Our study demonstrates the cellular architecture of the developing EC and provides a proof-of-concept approach for using scRNA-seq data to produce region-specific neurons from induced pluripotent stem cells. We demonstrate that scRNA-seq data from the developing and postnatal brain can be used to identify transcriptional regulators important for specification of neuronal cell subtypes. We identified in a proof-of-concept study that six TFs: *FOXP1*, *SOX5*, *TCF4*,  
655 *MEF2C*, *RUNX1T1* and *EYA2*, when added in combination, resulted in the differentiation of entorhinal SC-like cells. Further studies are required to identify if one or more of these TFs may be redundant in the reprogramming process. This could have been facilitated in hindsight if Ngn2 had been removed from the leave-one-out experiment. Nevertheless, we prove that  
660 transcriptional regulators of neuronal subtype cell fate can be identified from scRNA-seq clusters which are defined in the curated TFcheckpoint list and extracted using the Findmarkers tool in Seurat. This study will fuel future studies for streamlining the reprogramming process and optimizing the transduction process.

665 The phenotype of the SC-like cells produced may reflect the intermediate SC which is an entorhinal cell type that expresses both Reelin and Calb (Fuchs et al., 2016; Witter et al., 2017). Interestingly, we could not detect *CALB1* in the RELN7 cluster, which could be attributed to low gene expression and threshold cut-offs of low expressing genes. Our own and other studies have shown peculiarities of CALB expression in the pig ventral telencephalon. For example,  
670 *CALB1* protein is localized only in white matter tracts in the EC of the postnatal pig EC and could not be detected at all, prior to E100 (two weeks prior to birth) (Liu et al., 2021). Further inherent differences show a lack of *CALB1* in mossy fibers, granule cells and pyramidal neurons in the pig hippocampus (Holm et al., 1990). Post transcriptional mechanisms might be responsible for a lack of protein expression in pyramidal neurons in the EC, such as upstream  
675 repressors of the open reading frame (Calvo, Pagliarini, & Mootha, 2009), frameshifting events (Dinman, 2012) or alternative transcription start sites that create different transcript isoforms (X. Wang, Hou, Quedenau, & Chen, 2016). The upregulation of *RELN* expression in the SC-like cells points to a SC phenotype as it is rarely expressed in neurons. An exception to the entorhinal SC are the glutamatergic granule cells in the cerebellum (Pesold et al., 1998). Instead  
680 *RELN* is predominantly expressed in GABAergic interneurons (Pesold et al., 1998), but the combination of genes in these cells did not reflect an interneuron phenotype. Instead, the co-expression of BCL11B and SATB2 highly favors a superficial or deep layer entorhinal neuron phenotype in the MEC (Liu et al., 2021), however LEF1 is highly enriched in the MEC LII (Ramsden, Surmeli, McDonagh, & Nolan, 2015) which points the cells towards having a  
685 superficial layer identity. The lack of Reelin protein expression is not surprising since we see protein expression of Reelin turns on several days (approx. 10 days in the pig) after birth of the SC (Liu et al., 2021), which may even be longer in the human, given the longer gestation period. Prolonged cultures of these iPSC-derived neurons and more extensive marker evaluation could

690 help to confirm their identity. We cannot rule out that the RELN6 population are also stellate  
cells residing in the superficial layers. These cells also expressed *BCL11B* but were *RORB*  
negative and expressed only low levels of *SATB2*. Our previous studies in the mouse EC show  
Reelin+/Bcl11b+ neurons are born in the superficial layers (LII and LIII) from E12.5 to E15,  
but most were born at E12.5 (Liu et al., 2021). Another subset of Reln+/Bcl11b- were also born  
695 from E12.5 to E15 (Liu et al., 2021). In the pig scRNA-seq data, both RELN6 and RELN7  
expressed similar low levels of *BCL11B* but appear to be born at different time points when  
assessing the varying proportions of the cells captured at E50 and E70. This suggests RELN6  
cells may arise earlier than RELN7 cells. However, we did not capture a *RELN+* population  
expressing high levels of *BCL11B* in the postnatal brain samples so it is difficult to confer our  
previous mouse data to our current porcine scRNA-seq data. Further studies analyzing  
700 differences between the RELN populations may help to distinguish the RELN subtypes better.

Our study also demonstrates that pig scRNA-seq data can be readily applied for generation of  
novel protocols in human iPSCs. Indeed we found the developing EC dataset projected  
extremely well using scmap to human and mouse fetal datasets. This was the case, even when  
705 the human datasets were at unmatched gestational ages and from the embryonic prefrontal  
cortex and adult middle temporal gyrus. Our previous findings have also identified that the pig  
poses as an excellent model of neurogenesis, given its long gestational length, completion of  
corticogenesis prior to birth and presence of a moderate outer subventricular zone (Liu et al.,  
2021).

710 Our single-cell profiling of the porcine postnatal EC revealed a high quality dataset which  
corroborates and further enhances knowledge of EC cell types in the postnatal brain. Another  
scRNA-seq study was recently published on the human adult EC from both AD patient and  
healthy brains, however, their data showed a median of 646 genes captured in 13,214 sequenced  
715 cells (Grubman et al., 2019) Similarly, Leng et al., profiled a higher number of cells in the  
human caudal EC (42,528 cells) however the depth of sequencing resulted in a variable number  
of genes captured per cell, for e.g. a mean of 2,000 genes per excitatory cell) (Leng et al., 2021).  
Our dataset resulted in a mean of 2,798 different genes captured per cell in the 24,294 cells. In  
a report by Grubman et al., the vast majority of cells captured in their dataset were  
720 predominantly glia with very few neurons (Grubman et al., 2019). For example in their study,  
only six neuronal subtypes could be identified in the adult EC. The Leng et al. study extended  
this knowledge and identified nine excitatory neuron populations. Our study identified twelve  
excitatory neurons, some of which exist only during development, but furthers the field's  
knowledge on the EC subtypes. We also characterized the neurons based on the two main  
725 neuron types of the EC, the pyramidal and SC subtypes. We identified at least three subtypes  
of pyramidal neurons and two stellate neuron subtypes in the postnatal MEC. We also identified  
four IN subtypes in the postnatal MEC which is fewer than the nine inhibitory neuron  
populations identified in Leng et al., in the adult human brain (Leng et al., 2021) but were able  
to detect six IN progenitor populations, when also including the *RELN+* population that  
730 clustered closely to the excitatory neurons in the excitatory neuron subclustering analyses. The  
variation in numbers of IN populations seen in our study compared to the Leng study may be  
due to species-specific differences, sampling differences or differences in clustering  
methodology. In regions where IN diversity have been well studied such as the amygdala, at  
least 6 classes of INs have been identified based on their discharge properties and  
735 electrophysiological profiles in the basolateral amygdala (Polepalli, Gooch, & Sah, 2020) and  
similar research is required in the EC to fully differentiate between the different IN subclasses.  
The INs lying in the superficial layers are particularly interesting for researchers studying the  
mechanisms underlying grid cell firing. We found expression of unique genes from IN4 and



740 IN0 to be highly abundant in the superficial layers of the mouse EC, but of the two populations,  
only IN4 is SST- which suggests this may be the IN population of most interest, since SST-  
/PVALB+ INs are directly coupled to grid cell firing (Miao, Cao, Moser, & Moser, 2017). We  
also confer with the Leng et al. study, that two oligodendrocyte populations exist in the  
745 postnatal brain (Leng et al., 2021). The two previous scRNA-seq studies on the EC have  
concentrated on differences between healthy and diseased brains and characterization of  
vulnerable cell populations to AD rather than on the characterization of the cell types *per se*.  
Our dataset therefore provides excellent insight into the cell diversity of the EC due to the  
increased cell capture rate, depth of sequencing, and subclustering analyses.

750 In conclusion, we demonstrate that scRNA-seq data from the developing brain can be used to  
produce novel protocols for direct programming of pluripotent stem cells into subtype specific  
entorhinal cell fates and we provide evidence in a proof-of-concept approach to produce SC-  
like cells. Production of novel cell types *ex-vivo* will facilitate research into tissues, such as the  
EC, which is afflicted early on in e.g. AD. We envisage future studies could further build upon  
755 this dataset by adding the spatial dimension and neuron connectivity to build even more  
accurate and detailed maps of the spatial processing system.

## METHODS

### 760 **Aim, design and setting of the study**

#### **Animal welfare and collection of brains**

The experiments conform to the relevant regulatory standards for use of fetal material.  
765 Crossbred male and female pig fetuses at Embryonic day (E)50, E60, and E70 of development  
were obtained from inseminated Danish Landrace/Yorkshire sows with Duroc boar semen from  
a local pig production farm. Deceased postnatal pigs were obtained at postnatal day (P)75 as a  
gift from Per Torp Sangild at the University of Copenhagen. Adult brains were obtained from  
sows killed for another study using an overdose of sodium phenobarbital by a professional  
770 issued with a license from the Danish Animal Experiment Inspectorate.

#### **Single-cell preparation**

In total we prepared 10 sequencing-libraries from isolated MECs from E50 (whole cell, 3  
775 brains, 1 batch), E60 (whole cell, 4 brains, 3 batches), E70 (whole cell, 4 brains, 3 batches;  
nucleus 1 brain, one batch) and from adult sow MEC (whole cell, 1 brain, 1 batch; nucleus, 1  
brain, 1 batch) (Table S1). Briefly, the individual MEC tissue was digested using a papain  
dissociation method, according to the manufacturer's guidelines (Worthington) with small  
modifications.

780 The EC was macroscopically dissected out (approx. 1 mm<sup>3</sup>) in the digest medium (1x PBS  
(Thermo Fisher Scientific), 1x Penicillin-Streptomycin (Sigma-Aldrich)), transferred to a  
3.5cm Petri dish and incubated in 1mL papain solution for 30 min at 37°C. The tissue was  
gently triturated 20 times. The cell suspension was diluted with 1 mL FBS (BioWest) and  
centrifuged for 5 min at 300 g at room temperature (RT). The supernatant was discarded and  
785 the cell pellet was resuspended in 2.7 mL digestion media (1x Neurobasal medium (Thermo  
Fisher Scientific), 10% FBS (BioWest), 1x Penicillin-Streptomycin (Sigma-Aldrich)), 300 uL  
albumin-ovomuroid inhibitor, and 150 uL DNase solution. The cell suspension was carefully  
layered on top of 5 ml of albumin-inhibitor solution in a 15 mL falcon tube and centrifuged for

790 6 min at 70 g at RT. The supernatant was discarded and the cell pellet was resuspended in 5 mL  
cell-resuspension media (1x Neurobasal medium (Thermo Fisher Scientific), B27 (Thermo  
Fisher Scientific), 1x Penicillin-Streptomycin (Sigma-Aldrich), bFGF (5 ng/ml, Prospec). The  
cells were counted (NucleoCounter, ChemoMetec) and ranged in viability from 80.4 - 88.4%  
(Viability and Cell Count assay), diluted to 100-2000 cells/uL used for single-cell library  
preparation.

795

### Single-nuclei isolation

Nuclei extraction was performed as described before (Krishnaswami et al., 2016) with the  
following modifications (Pfisterer et al., 2020). Prior to nuclei extraction, nuclei isolation  
medium 1 (NIM1) (250 mM sucrose, 25 mM KCl, 5 mM MgCl<sub>2</sub>, 10 mM Tris Buffer pH8),  
800 NIM2 (NIM1 buffer supplemented with 1 μM DTT (Thermo Fisher Scientific) and 1x EDTA-  
free protease inhibitors (Roche) and homogenization (NIM2 buffer supplemented with  
Recombinant RNase Inhibitor (0.4 U/μL, Takara), SUPERase in (0.2 U/μL, Thermo Fisher  
Scientific) and Triton (0.1% v/v, Sigma-Aldrich)) buffers were prepared. Briefly, sectioned  
frozen brain tissue was placed into pre-cooled 1ml dounce homogenizer (Wheaton) with 1ml  
805 ice-cooled homogenization buffer. Tissue was dissociated on ice using 5-6 strokes with the  
loose pestle and 15-17 strokes with the tight pestle. Homogenate was first filtered through a 70  
μm filter. Nuclei were collected (900 g, 10 min) and resuspended in 500μl staining buffer  
(nuclease free PBS (1X, Thermo Fisher Scientific), BSA (0.5% wt/vol, Sigma-Aldrich),  
SUPERase in (0.2 U/μL, Thermo Fisher Scientific)). The sample was stained with 7-AAD  
810 (2ug/uL, Sigma-Aldrich) in order to visualize nuclei during FACS sorting. 7-AAD positive  
nuclei were FACS-isolated (70 μm nozzle, BD Biosciences, BD FACSAria™) into a 1.5ml  
ependorf tube containing 10 μl 10% nuclease free BSA (Thermo Fisher Scientific). Single 7-  
AAD+ nuclei were isolated using the gating strategy similar to Pfisterer et al (Pfisterer et al.,  
2020).

815

### Single-nuclei RNA-seq library preparation and sequencing

Whole cells were loaded onto the 10X Genomics microfluidic chip according to the Chromium  
Single Cell 3' Reagent Kits User Guide version 2 chemistry (10X Genomics). The single-nuclei  
samples were loaded as per whole cells, albeit the samples were not diluted. 10-12.000 thousand  
820 cells/nuclei were loaded from each sample.

Libraries from two samples at different stages were pooled and sequenced together on an  
Illumina NextSeq 500 (Table S1) following the NextSeq System Denature and Dilute Libraries  
Guide Protocol A: Standard Normalization Method (illumina). The NextSeq 500/550 High  
825 Output Reagent Cartridge v2 75 cycles (illumina) kit was used for the whole cell and single-  
nuclei samples and the pooled library were sequenced on NextSeq 500. The sequencing cycles  
were: Read1, 26 cycles, i7 Index 8 cycles, i5 Index 0 cycles; Read2, 57 cycles.

### Plasmid design and construction

830 The selected genes of interest (GOIs) were cloned into the pTet-O-Ngn2-puro plasmid  
(Addgene #52047) by replacing *Ngn2* with the GOI. This ensured that the GOI was fused to  
the puromycin resistance gene. Plasmids containing *EYA2* (Addgene #49264), *RUNX1T1*  
(Addgene #49264), *TCF4* (Addgene #109144), *Foxp1* (Addgene #16362), *Sox5* (Addgene  
#48707) and *MEF2C* (Addgene #61538) were all acquired from Addgene. Forward and reverse  
835 primers were designed for subcloning all GOIs (with the exception of *MEF2C* which was  
already subcloned into a lentiviral Tet-O plasmid (Addgene #61538) (see Table S2 for primer  
sequences). Gene inserts were amplified from the plasmids by PCR amplification using 400 -  
600 ng template plasmid, 0.5 μM forward and reverse primer (Eurofins Genomics), 5 μL Pfu

840 DNA Polymerase 10X Buffer (Promega), 1  $\mu$ L Pfu DNA Polymerase (Promega), and 200  $\mu$ M  
dNTP mix (Promega) in a 50  $\mu$ L reaction volume. The following program was used in a PTC-  
200 Thermal Cycler (MJ Research): 1 cycle of 2 min at 95  $^{\circ}$ C, 40 cycles of 1 min at 95  $^{\circ}$ C, 30  
sec at 60  $^{\circ}$ C, and 1 min at 72  $^{\circ}$ C. The PCR amplified inserts were run on a 1% agarose gel and  
purified using the Wizard SV Gel and PCR Clean-Up System kit (Promega) according to the  
845 manufacturer's instructions. The gene insert was then ligated into a Zero Blunt TOPO vector  
using the Zero Blunt TOPO PCR Cloning Kit (Invitrogen) according to the manufacturer's  
protocol. The TOPO vector containing the gene insert was heat-shock transformed into  
competent *E. coli* (NEB Stable C3040I), and grown at 37  $^{\circ}$ C O/N on agar (Sigma-Aldrich)  
plates containing 50 mg/mL kanamycin (Sigma-Aldrich) for selection. Individual colonies were  
propagated at 37  $^{\circ}$ C O/N in 5 mL Luria-Bertani (LB) broth (Sigma-Aldrich) supplemented with  
850 50 mg/mL kanamycin. Plasmids were isolated using the PureYield Plasmid Miniprep System  
(Promega) according to the manufacturer's protocol. The GOIs were isolated from the purified  
plasmids by digestion with EcoRI (Esp3I for RUNX1T1) and XbaI according to the  
manufacturer's protocol (FastDigest, Thermo Fisher Scientific). Positive clones were purified  
from a 1% agarose gel. The GOI was then inserted and ligated into a dephosphorylated pTet-  
855 O-Ngn2-puro (addgene 52047) backbone to create the final plasmid; pTet-O-GOI-puro using  
the LigaFast Rapid DNA Ligation System (Promega) and heat-shock transformed into  
competent *E. coli*. Individual colonies were selected and isolated using the PureYield Plasmid  
Miniprep System (Promega) according to the manufacturer's protocol. Correct plasmid inserts  
were validated by digestion with EcoRI and XbaI (FastDigest, Thermo Scientific). The  
860 plasmids were verified by Sanger sequencing (Eurofins Genomics) and stored at  $-80^{\circ}$ C until  
use for virus production.

### **Lentiviral production and titering**

865 Second generation lentiviruses were produced following transfection of HEK293FT cells. On  
the day of transfection, HEK293FT cells were cultured in fresh DMEM supplemented with  
10% newborn bovine calf serum (NCS) (Hyclone, New Zealand) in the absence of antibiotics.  
The cells were transfected as follows: In one tube, 50  $\mu$ L Lipofectamine 3000 reagent  
(Invitrogen) was diluted in 1.5 mL Opti-MEM (Gibco; Thermo Fisher Scientific). 40  $\mu$ L P3000  
reagent (Invitrogen) and 5 pmol DNA plasmids (1.5 pmol psPAX2 (Addgene #12260), 1.5  
870 pmol pMD2.G (Addgene #12259) and 2 pmol transfer plasmid containing the GOI) were  
diluted in 1.5 mL Opti-MEM. The two tubes were mixed and incubated at RT for 10 min and  
the solution was then added dropwise to the cells. After 24 h the media was replaced with fresh  
DMEM supplemented with 10% NCS and incubated for 48 h. The virus was harvested 72 h  
post transfection. The virus was spun at 500 g for 5 min and the supernatant filtered through a  
875 45  $\mu$ m polyethersulfone filter (Fisher Scientific) and subsequently concentrated, by spinning at  
23,000 rpm (using rotor Beckman Type 60 Ti) for 2 h at 4  $^{\circ}$ C. The supernatant was discarded  
and 100  $\mu$ L PBS was added to the pellet and incubated for 1 h at 4  $^{\circ}$ C. The pellet was  
resuspended by pipetting and stored at  $-80^{\circ}$ C until use for transduction.

880 Titering of virus was performed on HEK293FT cells by adding lentivirus at different amounts  
(from 1 to 15  $\mu$ L virus). A virus with a predetermined titer was added as a reference and a  
negative control without virus was included. On Day 1, the media was substituted with fresh  
media, and 48 h (Day 2) after transduction, the genomic DNA (gDNA) was extracted from the  
cells using the PureLink Genomic DNA Mini Kit (Invitrogen) according to the manufacturer's  
885 protocol. Each sample was analyzed in triplicate by qPCR using both primers for a sequence  
fused to the GOI (LV2), fused to all GOIs, and for the  $\beta$ -actin intron (see Table S3 for primer  
sequences). The LV2 was used to determine the degree of viral integration into the genome.  
The  $\beta$ -actin gene was used to determine the number of genome copies, as an estimate for the



890 total number of cells. For the qPCR reaction, 5  $\mu$ L SYBR green (Roche), 1  $\mu$ L 10 mM of both forward and reverse primer and 15 ng gDNA was mixed in a 10  $\mu$ L reaction volume and loaded in a white qPCR plate with optical caps (Thermo Fisher Scientific). Samples were spun briefly and run on a Mx3005P qPCR machine (Agilent) using the following program: 1 cycle of 10 min at 95 °C, 40 cycles of 20 sec at 95 °C, 20 sec at 55 °C, and 30 sec at 72 °C, followed by a melting curve analysis.

895 The viral titers were determined based on a recently published approach with minor variations (Gill & Denham, 2020). Briefly Ct values were converted from their intrinsic exponential relation to linear related  $X_o$  values, using the  $X_o$  method (Thomsen, Solvsten, Linnet, Blechingberg, & Nielsen, 2010). The triplicate LV2  $X_o$  mean values for a sample was  
900 normalized to its mean  $X_o$  value for  $\beta$ -actin to obtain the copy number of integrated GOI relative to  $\beta$ -actin gene copies in the given sample. A standard curve of normalized LV2 sequence copy number versus the volume of virus that was added to the sample initially was fitted for each titration of the virus, respectively. All curves followed a linear relationship with  $R^2$  ranging from 0.889 to 0.995. The relative GOI integration for the reference virus was then  
905 calculated and inserted into the linear regression curves for each respective virus, where (VPD, volume of produced virus):  $VPD = a * \text{relative copy number of reference virus} + b$ . The VPD is a measure of the volume of the produced virus that is needed, under the same conditions as the reference virus, to obtain the same degree of GOI integration as was obtained for the reference virus. The VPD for each of the produced viruses was hence calculated by inserting  
910 the relative copy number of the reference virus in the linear regression for the respective virus produced. The titer of the produced virus was finally calculated based on the titer of the reference virus, using a multiplicity of infection (MOI) of 10, where U is units of viral particles:  $VPD = (\text{Number of cells} * \text{MOI}) / \text{Titer (U / } \mu\text{L)}$ .

### 915 **Cell culture**

For direct reprogramming, two human iPSC lines were selected including the human SFC180-01-01 (female donor, healthy, age unknown) and WTSli024A (female donor, healthy, age 50-54) (both acquired from the EBiSC cell bank). The cells were maintained in Geltrex (Gibco; Thermo Fisher Scientific) coated dishes with mTESR media (Stemcell Technologies)  
920 supplemented with 1% Penicillin-Streptomycin (Gibco; Thermo Fisher Scientific). The cells were passaged using 0.5 mM EDTA (Merck) and propagated until they reached 50-60% confluency, before initiating reprogramming using the produced lentivirus. The cell lines were cultured at 37 °C in 5% CO<sub>2</sub> with 90% humidity.

### 925 **Transduction of human iPSCs**

Human iPSCs were transduced in mTESR in the absence of antibiotics and with 6  $\mu$ g/mL polybrene (Millipore). The lentiviruses containing the GOIs were transduced using 10 MOI in the presence of the reverse tetracycline transactivator M2rtTA (MOI 10). After 3 h the media was supplemented with half the usual volume of fresh media. The day after viral transduction  
930 was considered Day 0, and the media was exchanged for medial pallium (MP) patterning media (47% Neurobasal A medium, 47% DMEM/F12+Glutamax, 1% Insulin-Transferrin-Selenium A (Gibco; Thermo Fisher Scientific), 2% B-27 Supplement (Gibco; Thermo Fisher Scientific), 1% CTS N-2 supplement (Gibco; Thermo Fisher Scientific), 0.5% GlutaMAX (Thermo Fisher Scientific), 1% Pen Strep, 0.3% Glucose, 3  $\mu$ M CHIR 99021 (Sigma-Aldrich), 5 nM BMP4  
935 (R&D systems), 1  $\mu$ g/mL doxycycline (Sigma-Aldrich)). On Day 2 and 3 the media was exchanged for MP patterning media supplemented with 3  $\mu$ g/mL puromycin to select for transduced cells. On Day 5, the cells were dissociated using dispase (Sigma-Aldrich), spun for 5 min at 300 g and cultured in NBM media (96% Neurobasal medium, 2% B-27 Supplement,

940 1% GlutaMAX, 1% pen strep, 1  $\mu\text{g}/\text{mL}$  doxycycline, 200  $\mu\text{M}$  Ascorbic Acid (Sigma-Aldrich),  
1  $\mu\text{M}$  DAPT (Sigma-Aldrich)) and 3  $\mu\text{g}/\text{mL}$  puromycin. Upon confluency, the cells were split  
onto triple coated (1x polyornithine (Sigma) 10  $\mu\text{g}/\text{mL}$  fibronectin (Sigma-Aldrich), 10  $\mu\text{g}/\text{mL}$   
PolyD laminin (Sigma-Aldrich) plates. The cells were propagated in the NBM medium up until  
D20.

#### 945 **Immunocytochemistry**

The differentiated human iPSCs were fixed on glass coverslips (VWR, Denmark) in 4% PFA  
for 15 min at RT and stored at 4°C until use. The cells were washed in PBS and permeabilized  
in 0.25% Triton X-100 in PBS, washed once in PBS-T (0.1% Tween-20 (Sigma-Aldrich) in  
PBS) and then treated with blocking buffer (10% NDS, 3% BSA, 0.1% Tween-20 in PBS) for  
950 30 min at RT. Immunocytochemistry was performed using a combination of primary antibodies  
targeted against BCL11B (1:400, Abcam, ab18465), Reelin (1:100, Santa-cruz, sc-25346) and  
vGLUT1 (1:200, Abcam, ab79774) diluted in blocking buffer 2 for 60 min at RT. The cells  
were washed 3x 5 min in PBS-T and incubated with secondary antibodies conjugated with  
955 Alexa fluorophores (1:1000, Invitrogen, A10036, A21208, and A21448) diluted in blocking  
buffer for 60 min at RT. The cells were then washed twice for 5 min in PBS-T and  
counterstained for 10 min with Hoechst 33342 (1  $\mu\text{g}/\text{mL}$  in PBS). The cells were washed 3x 5  
min in PBS, dipped 3x in deionized water and mounted onto microscope slides using buffered  
glycerol mounting media 90% glycerol (Sigma-Aldrich), 20mM Tris pH 8.0, 0.5% N-propyl  
gallate (Sigma-Aldrich).

960

#### **Image processing and quantification**

For acquisition of immunocytochemistry images, a confocal microscope Leica TCS SPE was  
used. Images were optimized for brightness and contrast using Fiji-ImageJ. Statistical analysis  
was conducted using the commercially available software Prism 7.0 (GraphPad Software).

965

#### **qPCR**

Total RNA was extracted from cells using TRIzol reagent (Life Technologies) according to the  
manufacturer's protocol. After isolation of the aqueous phase 10  $\mu\text{g}$  of glycogen (Thermo  
Fisher Scientific) was supplemented before precipitation of the RNA. The pellet was  
970 resuspended in nuclease free water and the concentration was determined using a NanoDrop.  
Synthesis of cDNA was performed using the GoScript Reverse Transcriptase kit (Promega)  
with random hexamer primers, according to the manufacturer's protocol. Lastly, samples were  
heat inactivated for 10 min at 70 °C and diluted in nuclease free water. The qPCR was  
performed in biological triplicates. For the qPCR reaction, 5  $\mu\text{L}$  SYBR green (Roche), 1  $\mu\text{L}$  10  
975 mM of both forward and reverse primer (see Table S3 for primer sequences) and 10  $\mu\text{L}$  cDNA  
was mixed in a 10  $\mu\text{L}$  reaction volume and loaded in a white qPCR plate with optical caps  
(Thermo Fisher Scientific). Samples were spun down briefly and run on a Mx3005P qPCR  
machine (Agilent) using the following program: 1 cycle of 10 min at 95 °C, 40 cycles of 20 sec  
at 95 °C, 20 sec at 52 °C, and 30 sec at 72 °C, followed by a melting curve analysis. The Ct  
980 values of all samples were first converted from their intrinsic exponential relation to linear  
related  $X_0$  values, using the  $X_0$  method (Thomsen et al., 2010). In brief, the triplicate LV2  $X_0$   
mean values for a sample was normalized to its mean  $X_0$  value for GAPDH. The SD was  
calculated accounting for the common coefficient of variation both for the housekeeping gene  
and the individual gene investigated. Values represent the gene expression normalized to the  
985 expression of GAPDH for each individual sample + SD. Statistical one-way ANOVA, with  
Tukey's multiple comparisons test was performed in GraphPad Prism, comparing the  
expression for one gene between all different samples.

## 990 QUANTIFICATION AND STATISTICAL ANALYSIS

990

### Initial quality control and data analysis

Briefly, the sequenced libraries were mapped to pre-mRNA and filtered using 10X Genomics Cell Ranger pipeline. The sequencing data was demultiplexed by bcl2fast (Illumina) which warped in the Cell Ranger followed by aligning to reference genome (Sscrofa11.1 release-94) by STAR (Dobin et al., 2013). Finally, mRNA molecules were counted by Cell Ranger. The quality of the sequencing libraries was assessed by Cell Ranger, which determined in each sample the sequencing depth cutoff that is required for cells to be included in the downstream analysis. All samples were merged for downstream clustering and data analysis, which was performed in Seurat v2 (Satija, Farrell, Gennert, Schier, & Regev, 2015). Similar numbers of UMIs and genes were observed across all batches (Figure S5A, B). Overview of number of cells, mean reads per cell, median genes per cell, and number of reads and pooled brains in the included scRNA-seq libraries can be found in Table S4.

995

1000

### Batch correction

We used decomposeVar from the 'scran' R package (RRID: SCR\_001905) in order to find a list of variable genes that are used for PCA dimensionality reduction; however, to aid the correspondence of single-cell to single-nucleus for down-stream analysis (such as clustering), we identified and excluded genes whose transcripts were highly abundant in empty droplets. Empty droplets were defined as cells with <50 UMIs. If the number transcripts that are found in the empty droplet is above 30% the total number of transcripts for a given gene (Figure S5C), that gene will be removed from the list of variable genes.

1010

The individual datasets were log-normalized and the PCA projected gene expression in the datasets were then batch corrected by FastMNN (Haghverdi et al., 2018), which reduced the distance between cell pairs that are found to be reciprocally nearest neighbors across batches (before batch correction; Figure S5D, after correction; Figure 1C). The merged dataset were visualized by t-distributed stochastic neighbour embedding (t-SNE) (van der Maaten & Hinton, 2008).

1015

### 1020 Unsupervised clustering and cell type identification

Cell types were identified using the Louvain algorithm (Blondel, Guillaume, Lambiotte, & Lefebvre, 2008) with a resolution parameter set at 1.6 for the entire dataset, 1.4 for the IN analysis, 1.2 for the oligodendrocyte analysis, and 1.0 for the IP and excitatory neuron analysis. The canonical markers were used to identify the neurons of the clusters (Figure 1D). In addition, we used two reference datasets which each contained smart-seq2 single-cells from human embryonic prefrontal cortex (Fan et al., 2018; Zhong et al., 2018) or from human adult middle temporal gyrus (Astick & Vanderhaeghen, 2018). We used scmap v1.12.0 (Kiselev et al., 2018) to project individual cells onto curated cell-type clusters that are available in each reference. Each cell-type prediction utilizes the consensus of three similarity measures from queried cell to reference cluster centroids using sets of cell-type markers that were identified in the respective reference datasets; however, only the human genes that possess an ortholog gene in pig were used as cell type marker for similarity measure calculation.

1025

1030

### Differential gene analysis

Marker genes were identified using scfind v3.7.0 (PMID 33649586) based on highest F1 score for cluster specific genes. In principle by: For cluster  $c_j$ , gene  $g_i$  is considered a true positive (TP) if it is expressed, a false negative (FN) if it is not expressed, a false positive (FP) if is

1035



expressed in a cell assigned to another cluster, and a true negative (TN) if it is not expressed in a cell assigned to a different cluster. For each  $g_i$  we evaluate precision =  $TP/(TP+FP)$ , recall =  $TP/(TP+FN)$ , and  $F1 = 2 * \text{precision} * \text{recall} / (\text{precision} + \text{recall})$ . For each  $c_j$ , genes are ranked by F1 with the highest scoring genes used as markers.

### Identification of cell type specific transcription factors

Four excitatory neuron clusters expressing *RELN*, determined as potential SC populations, were investigated for cluster-specific enriched TFs. Porcine genes were defined as TFs (total of 2475 genes) if they, or orthologues, were present in the TFcheckpoint, a list of 3479 specific DNA-binding RNA polymerase II TFs curated by Chawla and colleagues (Chawla et al., 2013). Differentially expressed TFs between each *RELN* cluster and all remaining cells were identified using FindMarkers in the Seurat pipeline (Butler, Hoffman, Smibert, Papalexi, & Satija, 2018), which uses Wilcoxon Rank Sum test. For each of the 2 *RELN* clusters, 20 TFs were selected with the highest log fold-change of average expression between the cluster and the remaining cells.

### Cell cycle score analysis

Cell cycle phases were scored using the built-in function in Seurat CellCycleScoring, which was used to determine whether a given cell was likely to be in either S, G2M or G1 (which is indistinguishable from G0) phase of cell cycle. Cell cycle scores were based on a list of cell cycle phase-specific genes proposed by Tirosh *et al.* (Tirosh et al., 2016).

### Code availability

All R code used for the analysis of this study is publically available at github: <https://github.com/BDD-lab/EC-scRNAseq-2021>

### Abbreviations

BMP – bone morphogenetic protein  
CHIR - GSK-3 $\alpha/\beta$  inhibitor  
CNS – central nervous system  
D – Day  
DMEM – dulbecco’s modified eagle’s medium  
E – Embryonic day  
EC – entorhinal cortex  
EDTA - Ethylenediaminetetraacetic acid  
gDNA – genomic DNA  
GOI – gene of interest  
h - hours  
iPSC –induced pluripotent stem cells  
IN – interneurons  
IP – intermediate progenitor  
L – layer  
LV - lentivirus  
LEC – lateral entorhinal cortex  
MEC – medial entorhinal cortex  
MOI – multiplicity of infection  
OPC – oligodendrocyte progenitor cell

- P – postnatal day  
PBS – phosphate-buffered saline  
1090 PCR – polymerase chain reaction  
PYR – pyramidal neuron  
qPCR – quantitative real time PCR  
*RELN* – Reelin gene  
RT – room temperature  
1095 scRNA-seq – Single-cell RNA sequencing  
SC – stellate cell  
SD – standard deviation  
SPE – speed cell  
SST – somatostatin  
1100 TF – transcription factor  
U – units of viral particles  
UMI – unique molecular identifier  
VPD – volume of produced virus

1105 **Declarations:**

**Ethics approval and consent to participate**

The experiments conform to the relevant regulatory standards for acquisition and use of fetal pig material.

1110

**Consent for publication**

All authors consent that this research is suitable for publication.

1115 **Availability of data and materials**

The datasets generated are available at the NCBI repository with GEO accession number GSE134482 (<https://www.ncbi.nlm.nih.gov/geo/query/acc.cgi?acc=GSE134482>). The submitted data includes the raw sequencing data as fastq files together with the processed count matrix used in this study.

1120

**Competing interests**

The authors declare that they have no competing interests.

**Funding**

- 1125 The project was financed by The Independent Research Fund, Denmark under the grant (ID: DFF-7017-00071 and 8021-00048B), Lundbeck fund (R296-2018-2287) and The Innovation Foundation (Brainstem (4108-00008B)). Konstantin Khodosevich acknowledges the Novo Nordisk Hallas-Møller Investigator grant (NNF16OC0019920). Tune Pers acknowledges the Novo Nordisk Foundation (Grant number NNF18CC0034900) and the Lundbeck Foundation  
1130 (Grant number R190-2014-3904). Martin Hemberg and Nikolaos Patikis were supported by a core grant to the Wellcome Sanger Institute from the Wellcome Trust. Louis-Francois Handfield was supported by Open Targets (OTAR038) and Jimmy Lee was supported by a CZI (2018-183503 (5022)) from the Chan Zuckerberg Initiative.

1135 **Authors' contributions**

TB: Performed scRNA-seq, direct programming, analyzed data and contributed to the writing of the manuscript

- YL: Performed scRNA-seq, analyzed data, designed the GOIs subclone pipeline and contributed to the writing of the manuscript
- 1140 LM: Performed lentiviral production.  
JL: Performed scRNA-seq analysis.  
UP: Performed scRNA-seq analysis  
L-FH: Contributed to methodology of bioinformatic analysis of the scRNA-seq data  
AAM: Performed scRNA-seq analysis
- 1145 ILV; Performed scRNA-seq analysis  
MD: Supplied Ngn2 backbones and Ngn2 lentivirus  
SES: Contributed to methodology of bioinformatic analysis of the scRNA-seq data  
JTHL: Contributed to methodology of bioinformatic analysis of the scRNA-seq data  
NP: Contributed to methodology of bioinformatic analysis of the scRNA-seq data
- 1150 MP: Contributed to methodology of bioinformatic analysis of the scRNA-seq data  
BRK: Contributed to methodology of scRNA-seq  
MD: Contributed with lentiviral plasmids for direct programming experiments and viral titrating methodology  
PH: Supervised project and contributed to acquisition of funding
- 1155 MPW: Contributed to anatomical analysis of the EC in the pig and in acquisition of funding  
JG: Provided server access for scRNA-seq data, supervised the project and contributed to interpretation of bioinformatic data  
MH: Provided software, personnel and resources for bioinformatic analyses of the scRNA-seq and contributed to interpretation of the scRNA-seq data
- 1160 THP: Provided materials, personnel and resources for scRNA-seq, supervised project and contributed to interpretation of the scRNA-seq data  
KK: Provided materials, personnel and resources for scRNA-seq, supervised project and contributed to interpretation of the data  
VH: Contributed to the project's concept, methodology, formal analyses, project's resources, writing, reviewing & editing the manuscript. Administered and managed the project and acquired the project's funding.
- 1165 All authors read and approved the final manuscript

### Acknowledgements

- 1170 We thank Per Torp Sangild for his donation of healthy adult sow brains for this study. We used the Single Cell Genomics Facility at BRIC for access to 10X Chromium platform. We also acknowledge the help from Anna Fossum at the FACS Facility at BRIC, University of Copenhagen for help with the FACS sorting.

### 1175 Declaration of Interests:

The authors declare no competing interests.

### References

- 1180 Abellan, A., Desfilis, E., & Medina, L. (2014). Combinatorial expression of Lef1, Lhx2, Lhx5, Lhx9, Lmo3, Lmo4, and Prox1 helps to identify comparable subdivisions in the developing hippocampal formation of mouse and chicken. *Front Neuroanat*, 8, 59. doi:10.3389/fnana.2014.00059
- 1185 Adachi, M., Lin, P. Y., Pranav, H., & Monteggia, L. M. (2016). Postnatal Loss of Mef2c Results in Dissociation of Effects on Synapse Number and Learning and Memory. *Biol Psychiatry*, 80(2), 140-148. doi:10.1016/j.biopsych.2015.09.018



- Allen Developing Mouse Brain Atlas. (2008). Retrieved from <https://developingmouse.brain-map.org/>
- 1190 Allen Mouse Brain Atlas. (2004). Retrieved from <https://mouse.brain-map.org/>
- Artegiani, B., Lyubimova, A., Muraro, M., van Es, J. H., van Oudenaarden, A., & Clevers, H. (2017). A Single-Cell RNA Sequencing Study Reveals Cellular and Molecular Dynamics of the Hippocampal Neurogenic Niche. *Cell Rep*, 21(11), 3271-3284. doi:10.1016/j.celrep.2017.11.050
- 1195 Astick, M., & Vanderhaeghen, P. (2018). From Human Pluripotent Stem Cells to Cortical Circuits. *Curr Top Dev Biol*, 129, 67-98. doi:10.1016/bs.ctdb.2018.02.011
- Bamba, Y., Shofuda, T., Kanematsu, D., Nonaka, M., Yamasaki, M., Okano, H., & Kanemura, Y. (2014). Differentiation, polarization, and migration of human induced pluripotent stem cell-derived neural progenitor cells co-cultured with a human glial cell line with radial glial-like characteristics. *Biochem Biophys Res Commun*, 447(4), 683-688. doi:10.1016/j.bbrc.2014.04.070
- 1200 Barber, K., Studer, L., & Fattahi, F. (2019). Derivation of enteric neuron lineages from human pluripotent stem cells. *Nat Protoc*, 14(4), 1261-1279. doi:10.1038/s41596-019-0141-y
- 1205 Barretto, N., Zhang, H., Powell, S. K., Fernando, M. B., Zhang, S., Flaherty, E. K., . . . Brennand, K. J. (2020). ASCL1- and DLX2-induced GABAergic neurons from hiPSC-derived NPCs. *J Neurosci Methods*, 334, 108548. doi:10.1016/j.jneumeth.2019.108548
- Batista-Brito, R., Rossignol, E., Hjerling-Leffler, J., Denaxa, M., Wegner, M., Lefebvre, V., . . . Fishell, G. (2009). The cell-intrinsic requirement of Sox6 for cortical interneuron development. *Neuron*, 63(4), 466-481. doi:10.1016/j.neuron.2009.08.005
- 1210 Beall, M. J., & Lewis, D. A. (1992). Heterogeneity of layer II neurons in human entorhinal cortex. *J Comp Neurol*, 321(2), 241-266. doi:10.1002/cne.903210206
- Bertuzzi, S., Porter, F. D., Pitts, A., Kumar, M., Agulnick, A., Wassif, C., & Westphal, H. (1999). Characterization of Lhx9, a novel LIM/homeobox gene expressed by the pioneer neurons in the mouse cerebral cortex. *Mech Dev*, 81(1-2), 193-198. doi:10.1016/s0925-4773(98)00233-0
- 1215 Bethea, C. L., Reddy, A. P., Pedersen, D., & Tokuyama, Y. (2009). Expression profile of differentiating serotonin neurons derived from rhesus embryonic stem cells and comparison to adult serotonin neurons. *Gene Expr Patterns*, 9(2), 94-108. doi:10.1016/j.gep.2008.10.002
- 1220 Bianchi, F., Malboubi, M., Li, Y., George, J. H., Jerusalem, A., Szele, F., . . . Ye, H. (2018). Rapid and efficient differentiation of functional motor neurons from human iPSC for neural injury modelling. *Stem Cell Res*, 32, 126-134. doi:10.1016/j.scr.2018.09.006
- Blake, J. A., & Ziman, M. R. (2014). Pax genes: regulators of lineage specification and progenitor cell maintenance. *Development*, 141(4), 737-751. doi:10.1242/dev.091785
- 1225 Blondel, V. D., Guillaume, J.-L., Lambiotte, R., & Lefebvre, E. (2008). Fast unfolding of communities in large networks. *J. Stat Mech.*, P10008.
- Bouhon, I. A., Joannides, A., Kato, H., Chandran, S., & Allen, N. D. (2006). Embryonic stem cell-derived neural progenitors display temporal restriction to neural patterning. *Stem Cells*, 24(8), 1908-1913. doi:10.1634/stemcells.2006-0031
- 1230 Braccioli, L., Vervoort, S. J., Adolfs, Y., Heijnen, C. J., Basak, O., Pasterkamp, R. J., . . . Coffey, P. J. (2017). FOXP1 Promotes Embryonic Neural Stem Cell Differentiation by Repressing Jagged1 Expression. *Stem Cell Reports*, 9(5), 1530-1545. doi:10.1016/j.stemcr.2017.10.012
- 1235

- Bruce, L. L., & Neary, T. J. (1995). The limbic system of tetrapods: a comparative analysis of cortical and amygdalar populations. *Brain Behav Evol*, 46(4-5), 224-234. doi:10.1159/000113276
- 1240 Butler, A., Hoffman, P., Smibert, P., Papalexi, E., & Satija, R. (2018). Integrating single-cell transcriptomic data across different conditions, technologies, and species. *Nat Biotechnol*, 36(5), 411-420. doi:10.1038/nbt.4096
- Calvo, S. E., Pagliarini, D. J., & Mootha, V. K. (2009). Upstream open reading frames cause widespread reduction of protein expression and are polymorphic among humans. *Proc Natl Acad Sci U S A*, 106(18), 7507-7512. doi:10.1073/pnas.0810916106
- 1245 Canto, C. B., & Witter, M. P. (2012a). Cellular properties of principal neurons in the rat entorhinal cortex. I. The lateral entorhinal cortex. *Hippocampus*, 22(6), 1256-1276. doi:10.1002/hipo.20997
- Canto, C. B., & Witter, M. P. (2012b). Cellular properties of principal neurons in the rat entorhinal cortex. II. The medial entorhinal cortex. *Hippocampus*, 22(6), 1277-1299. doi:10.1002/hipo.20993
- 1250 Canto, C. B., Wouterlood, F. G., & Witter, M. P. (2008). What does the anatomical organization of the entorhinal cortex tell us? *Neural Plast*, 2008, 381243. doi:10.1155/2008/381243
- Cao, S. Y., Hu, Y., Chen, C., Yuan, F., Xu, M., Li, Q., . . . Liu, Y. (2017). Enhanced derivation of human pluripotent stem cell-derived cortical glutamatergic neurons by a small molecule. *Sci Rep*, 7(1), 3282. doi:10.1038/s41598-017-03519-w
- 1255 Chan, C. H., Godinho, L. N., Thomaidou, D., Tan, S. S., Gulisano, M., & Parnavelas, J. G. (2001). Emx1 is a marker for pyramidal neurons of the cerebral cortex. *Cereb Cortex*, 11(12), 1191-1198. doi:10.1093/cercor/11.12.1191
- 1260 Chawla, K., Tripathi, S., Thommesen, L., Laegreid, A., & Kuiper, M. (2013). TFcheckpoint: a curated compendium of specific DNA-binding RNA polymerase II transcription factors. *Bioinformatics*, 29(19), 2519-2520. doi:10.1093/bioinformatics/btt432
- Chen, M., Maimaitili, M., Habekost, M., Gill, K. P., Mermet-Joret, N., Nabavi, S., . . . Denham, M. (2020). Rapid generation of regionally specified CNS neurons by sequential patterning and conversion of human induced pluripotent stem cells. *Stem Cell Res*, 48, 101945. doi:10.1016/j.scr.2020.101945
- 1265 Chipman, P. H., Toma, J. S., & Rafuse, V. F. (2012). Generation of motor neurons from pluripotent stem cells. *Prog Brain Res*, 201, 313-331. doi:10.1016/B978-0-444-59544-7.00015-9
- 1270 Chuang, J. H., Tung, L. C., Lee-Chen, G. J., Yin, Y., & Lin, Y. (2011). An approach for differentiating uniform glutamatergic neurons from mouse embryonic stem cells. *Anal Biochem*, 410(1), 149-151. doi:10.1016/j.ab.2010.11.027
- Daadi, M. M. (2019). Differentiation of Neural Stem Cells Derived from Induced Pluripotent Stem Cells into Dopaminergic Neurons. *Methods Mol Biol*, 1919, 89-96. doi:10.1007/978-1-4939-9007-8\_7
- 1275 Desfilis, E., Abellan, A., Sentandreu, V., & Medina, L. (2018). Expression of regulatory genes in the embryonic brain of a lizard and implications for understanding pallial organization and evolution. *J Comp Neurol*, 526(1), 166-202. doi:10.1002/cne.24329
- 1280 Diekmann, S., Nitsch, R., & Ohm, T. G. (1994). The organotypic entorhinal-hippocampal complex slice culture of adolescent rats. A model to study transcellular changes in a circuit particularly vulnerable in neurodegenerative disorders. *J Neural Transm Suppl*, 44, 61-71. Retrieved from <https://www.ncbi.nlm.nih.gov/pubmed/7897400>

- 1285 Dimos, J. T., Rodolfa, K. T., Niakan, K. K., Weisenthal, L. M., Mitsumoto, H., Chung, W., . . .  
Eggan, K. (2008). Induced pluripotent stem cells generated from patients with ALS  
can be differentiated into motor neurons. *Science*, *321*(5893), 1218-1221.  
doi:10.1126/science.1158799
- 1290 Dinman, J. D. (2012). Mechanisms and implications of programmed translational  
frameshifting. *Wiley Interdiscip Rev RNA*, *3*(5), 661-673. doi:10.1002/wrna.1126
- Dobin, A., Davis, C. A., Schlesinger, F., Drenkow, J., Zaleski, C., Jha, S., . . . Gingeras, T. R.  
(2013). STAR: ultrafast universal RNA-seq aligner. *Bioinformatics*, *29*(1), 15-21.  
doi:10.1093/bioinformatics/bts635
- 1295 Domnisoru, C., Kinkhabwala, A. A., & Tank, D. W. (2013). Membrane potential dynamics of  
grid cells. *Nature*, *495*(7440), 199-204. doi:10.1038/nature11973
- Duan, L., Peng, C. Y., Pan, L., & Kessler, J. A. (2015). Human pluripotent stem cell-derived  
radial glia recapitulate developmental events and provide real-time access to  
cortical neurons and astrocytes. *Stem Cells Transl Med*, *4*(5), 437-447.  
doi:10.5966/sctm.2014-0137
- 1300 Falk, A., Koch, P., Kesavan, J., Takashima, Y., Ladewig, J., Alexander, M., . . . Brustle, O.  
(2012). Capture of neuroepithelial-like stem cells from pluripotent stem cells  
provides a versatile system for in vitro production of human neurons. *PLoS One*,  
*7*(1), e29597. doi:10.1371/journal.pone.0029597
- 1305 Fan, X., Dong, J., Zhong, S., Wei, Y., Wu, Q., Yan, L., . . . Tang, F. (2018). Spatial transcriptomic  
survey of human embryonic cerebral cortex by single-cell RNA-seq analysis. *Cell  
Res*, *28*(7), 730-745. doi:10.1038/s41422-018-0053-3
- Friocourt, G., & Parnavelas, J. G. (2011). Identification of Arx targets unveils new  
candidates for controlling cortical interneuron migration and differentiation.  
*Front Cell Neurosci*, *5*, 28. doi:10.3389/fnbeh.2011.00028
- 1310 10.3389/fncel.2011.00028
- Fuchs, E. C., Neitz, A., Pinna, R., Melzer, S., Caputi, A., & Monyer, H. (2016). Local and Distant  
Input Controlling Excitation in Layer II of the Medial Entorhinal Cortex. *Neuron*,  
*89*(1), 194-208. doi:10.1016/j.neuron.2015.11.029
- 1315 Fujimaru, Y., & Kosaka, T. (1996). The distribution of two calcium binding proteins,  
calbindin D-28K and parvalbumin, in the entorhinal cortex of the adult mouse.  
*Neurosci Res*, *24*(4), 329-343. Retrieved from  
<https://www.ncbi.nlm.nih.gov/pubmed/8861103>
- Gelman, D. M., & Marin, O. (2010). Generation of interneuron diversity in the mouse  
cerebral cortex. *Eur J Neurosci*, *31*(12), 2136-2141. doi:10.1111/j.1460-  
1320 9568.2010.07267.x
- Germroth, P., Schwerdtfeger, W. K., & Buhl, E. H. (1989). Morphology of identified  
entorhinal neurons projecting to the hippocampus. A light microscopical study  
combining retrograde tracing and intracellular injection. *Neuroscience*, *30*(3), 683-  
691. doi:10.1016/0306-4522(89)90161-9
- 1325 Gill, K. P., & Denham, M. (2020). Optimized Transgene Delivery Using Third-Generation  
Lentiviruses. *Curr Protoc Mol Biol*, *133*(1), e125. doi:10.1002/cpmb.125
- Giocomo, L. M., Stensola, T., Bonnevie, T., Van Cauter, T., Moser, M. B., & Moser, E. I. (2014).  
Topography of head direction cells in medial entorhinal cortex. *Curr Biol*, *24*(3),  
252-262. doi:10.1016/j.cub.2013.12.002
- 1330 Gorris, R., Fischer, J., Erwes, K. L., Kesavan, J., Peterson, D. A., Alexander, M., . . . Brustle, O.  
(2015). Pluripotent stem cell-derived radial glia-like cells as stable intermediate  
for efficient generation of human oligodendrocytes. *Glia*, *63*(12), 2152-2167.  
doi:10.1002/glia.22882



- 1335 Grubman, A., Chew, G., Ouyang, J. F., Sun, G., Choo, X. Y., McLean, C., . . . Polo, J. M. (2019). A single-cell atlas of entorhinal cortex from individuals with Alzheimer's disease reveals cell-type-specific gene expression regulation. *Nat Neurosci*, *22*(12), 2087-2097. doi:10.1038/s41593-019-0539-4
- 1340 Haghverdi, L., Lun, A. T. L., Morgan, M. D., & Marioni, J. C. (2018). Batch effects in single-cell RNA-sequencing data are corrected by matching mutual nearest neighbors. *Nat Biotechnol*, *36*(5), 421-427. doi:10.1038/nbt.4091
- Hebert, J. M., Mishina, Y., & McConnell, S. K. (2002). BMP signaling is required locally to pattern the dorsal telencephalic midline. *Neuron*, *35*(6), 1029-1041. doi:10.1016/s0896-6273(02)00900-5
- 1345 Hill, M. J., Killick, R., Navarrete, K., Maruszak, A., McLaughlin, G. M., Williams, B. P., & Bray, N. J. (2017). Knockdown of the schizophrenia susceptibility gene TCF4 alters gene expression and proliferation of progenitor cells from the developing human neocortex. *J Psychiatry Neurosci*, *42*(3), 181-188. doi:10.1503/jpn.160073
- 1350 Hisaoka, T., Nakamura, Y., Senba, E., & Morikawa, Y. (2010). The forkhead transcription factors, Foxp1 and Foxp2, identify different subpopulations of projection neurons in the mouse cerebral cortex. *Neuroscience*, *166*(2), 551-563. doi:10.1016/j.neuroscience.2009.12.055
- Hodge, R. D., Bakken, T. E., Miller, J. A., Smith, K. A., Barkan, E. R., Graybuck, L. T., . . . Lein, E. S. (2019). Conserved cell types with divergent features in human versus mouse cortex. *Nature*, *573*(7772), 61-68. doi:10.1038/s41586-019-1506-7
- 1355 Hofrichter, M., Nimtz, L., Tigges, J., Kabiri, Y., Schroter, F., Royer-Pokora, B., . . . Fritsche, E. (2017). Comparative performance analysis of human iPSC-derived and primary neural progenitor cells (NPC) grown as neurospheres in vitro. *Stem Cell Res*, *25*, 72-82. doi:10.1016/j.scr.2017.10.013
- 1360 Holm, I. E., Geneser, F. A., Zimmer, J., & Baimbridge, K. G. (1990). Immunocytochemical demonstration of the calcium-binding proteins calbindin-D 28k and parvalbumin in the subiculum, hippocampus and dentate area of the domestic pig. *Prog Brain Res*, *83*, 85-97. doi:10.1016/s0079-6123(08)61243-1
- 1365 Hu, J. G., Wang, Y. X., Zhou, J. S., Chen, C. J., Wang, F. C., Li, X. W., & Lu, H. Z. (2011). Differential gene expression in oligodendrocyte progenitor cells, oligodendrocytes and type II astrocytes. *Tohoku J Exp Med*, *223*(3), 161-176. Retrieved from <https://www.ncbi.nlm.nih.gov/pubmed/21372517>
- 1370 Jo, J., Xiao, Y., Sun, A. X., Cukuroglu, E., Tran, H. D., Goke, J., . . . Ng, H. H. (2016). Midbrain-like Organoids from Human Pluripotent Stem Cells Contain Functional Dopaminergic and Neuromelanin-Producing Neurons. *Cell Stem Cell*, *19*(2), 248-257. doi:10.1016/j.stem.2016.07.005
- Jovanovic, V. M., Salti, A., Tilleman, H., Zega, K., Jukic, M. M., Zou, H., . . . Brodski, C. (2018). BMP/SMAD Pathway Promotes Neurogenesis of Midbrain Dopaminergic Neurons In Vivo and in Human Induced Pluripotent and Neural Stem Cells. *J Neurosci*, *38*(7), 1662-1676. doi:10.1523/JNEUROSCI.1540-17.2018
- 1375 Kanatani, S., Yozu, M., Tabata, H., & Nakajima, K. (2008). COUP-TFII is preferentially expressed in the caudal ganglionic eminence and is involved in the caudal migratory stream. *J Neurosci*, *28*(50), 13582-13591. doi:10.1523/JNEUROSCI.2132-08.2008
- 1380 Kennedy, A. J., Rahn, E. J., Paulukaitis, B. S., Savell, K. E., Kordasiewicz, H. B., Wang, J., . . . Sweatt, J. D. (2016). Tcf4 Regulates Synaptic Plasticity, DNA Methylation, and Memory Function. *Cell Rep*, *16*(10), 2666-2685. doi:10.1016/j.celrep.2016.08.004

- Kikuchi, T., Morizane, A., Doi, D., Magotani, H., Onoe, H., Hayashi, T., . . . Takahashi, J. (2017). Human iPS cell-derived dopaminergic neurons function in a primate Parkinson's disease model. *Nature*, *548*(7669), 592-596. doi:10.1038/nature23664
- 1385 Kim, H., Berens, N. C., Ochandarena, N. E., & Philpot, B. D. (2020). Region and Cell Type Distribution of TCF4 in the Postnatal Mouse Brain. *Front Neuroanat*, *14*, 42. doi:10.3389/fnana.2020.00042
- Kiselev, V. Y., Yiu, A., & Hemberg, M. (2018). scmap: projection of single-cell RNA-seq data across data sets. *Nat Methods*, *15*(5), 359-362. doi:10.1038/nmeth.4644
- 1390 Kitamura, T., Pignatelli, M., Suh, J., Kohara, K., Yoshiki, A., Abe, K., & Tonegawa, S. (2014). Island cells control temporal association memory. *Science*, *343*(6173), 896-901. doi:10.1126/science.1244634
- Kobro-Flatmoen, A., Nagelhus, A., & Witter, M. P. (2016). Reelin-immunoreactive neurons in entorhinal cortex layer II selectively express intracellular amyloid in early Alzheimer's disease. *Neurobiol Dis*, *93*, 172-183. doi:10.1016/j.nbd.2016.05.012
- 1395 Kriks, S., Shim, J. W., Piao, J., Ganat, Y. M., Wakeman, D. R., Xie, Z., . . . Studer, L. (2011). Dopamine neurons derived from human ES cells efficiently engraft in animal models of Parkinson's disease. *Nature*, *480*(7378), 547-551. doi:10.1038/nature10648
- 1400 Krishnaswami, S. R., Grindberg, R. V., Novotny, M., Venepally, P., Lacar, B., Bhutani, K., . . . Lasken, R. S. (2016). Using single nuclei for RNA-seq to capture the transcriptome of postmortem neurons. *Nat Protoc*, *11*(3), 499-524. doi:10.1038/nprot.2016.015
- Kropff, E., Carmichael, J. E., Moser, M. B., & Moser, E. I. (2015). Speed cells in the medial entorhinal cortex. *Nature*, *523*(7561), 419-424. doi:10.1038/nature14622
- 1405 Kumamoto, T., Toma, K., Gunadi, McKenna, W. L., Kasukawa, T., Katzman, S., . . . Hanashima, C. (2013). Foxg1 coordinates the switch from nonradially to radially migrating glutamatergic subtypes in the neocortex through spatiotemporal repression. *Cell Rep*, *3*(3), 931-945. doi:10.1016/j.celrep.2013.02.023
- Kumar, M., Kaushalya, S. K., Gressens, P., Maiti, S., & Mani, S. (2009). Optimized derivation and functional characterization of 5-HT neurons from human embryonic stem cells. *Stem Cells Dev*, *18*(4), 615-627. doi:10.1089/scd.2008.0181
- 1410 Kwan, K. Y., Lam, M. M., Krsnik, Z., Kawasawa, Y. I., Lefebvre, V., & Sestan, N. (2008). SOX5 postmitotically regulates migration, postmigratory differentiation, and projections of subplate and deep-layer neocortical neurons. *Proc Natl Acad Sci U S A*, *105*(41), 16021-16026. doi:10.1073/pnas.0806791105
- 1415 Lacin, H., Zhu, Y., Wilson, B. A., & Skeath, J. B. (2009). dbx mediates neuronal specification and differentiation through cross-repressive, lineage-specific interactions with eve and hb9. *Development*, *136*(19), 3257-3266. doi:10.1242/dev.037242
- Lai, T., Jabaudon, D., Molyneaux, B. J., Azim, E., Arlotta, P., Menezes, J. R., & Macklis, J. D. (2008). SOX5 controls the sequential generation of distinct corticofugal neuron subtypes. *Neuron*, *57*(2), 232-247. doi:10.1016/j.neuron.2007.12.023
- 1420 Lamprianou, S., Chatzopoulou, E., Thomas, J. L., Bouyain, S., & Harroch, S. (2011). A complex between contactin-1 and the protein tyrosine phosphatase PTPRZ controls the development of oligodendrocyte precursor cells. *Proc Natl Acad Sci U S A*, *108*(42), 17498-17503. doi:10.1073/pnas.1108774108
- 1425 Lein, E. S., Hawrylycz, M. J., Ao, N., Ayres, M., Bensinger, A., Bernard, A., . . . Jones, A. R. (2007). Genome-wide atlas of gene expression in the adult mouse brain. *Nature*, *445*(7124), 168-176. doi:10.1038/nature05453
- Leitner, F. C., Melzer, S., Lutcke, H., Pinna, R., Seeburg, P. H., Helmchen, F., & Monyer, H. (2016). Spatially segregated feedforward and feedback neurons support
- 1430

- differential odor processing in the lateral entorhinal cortex. *Nat Neurosci*, 19(7), 935-944. doi:10.1038/nn.4303
- Leng, K., Li, E., Eser, R., Piergies, A., Sit, R., Tan, M., . . . Kampmann, M. (2021). Molecular characterization of selectively vulnerable neurons in Alzheimer's disease. *Nat Neurosci*. doi:10.1038/s41593-020-00764-7
- 1435 Li, K., Kong, Y., Zhang, M., Xie, F., Liu, P., & Xu, S. (2016). Differentiation of pluripotent stem cells for regenerative medicine. *Biochem Biophys Res Commun*, 471(1), 1-4. doi:10.1016/j.bbrc.2016.01.182
- Li, W., Sun, W., Zhang, Y., Wei, W., Ambasadhan, R., Xia, P., . . . Ding, S. (2011). Rapid induction and long-term self-renewal of primitive neural precursors from human embryonic stem cells by small molecule inhibitors. *Proc Natl Acad Sci U S A*, 108(20), 8299-8304. doi:10.1073/pnas.1014041108
- 1440 Li, X., Xiao, J., Frohlich, H., Tu, X., Li, L., Xu, Y., . . . Chen, J. G. (2015). Foxp1 regulates cortical radial migration and neuronal morphogenesis in developing cerebral cortex. *PLoS One*, 10(5), e0127671. doi:10.1371/journal.pone.0127671
- 1445 Lin, G., Mela, A., Guilfoyle, E. M., & Goldman, J. E. (2009). Neonatal and adult O4(+) oligodendrocyte lineage cells display different growth factor responses and different gene expression patterns. *J Neurosci Res*, 87(15), 3390-3402. doi:10.1002/jnr.22065
- 1450 Linqing, Z., Guohua, J., Haoming, L., Xuelei, T., Jianbing, Q., & Meiling, T. (2015). Runx1t1 regulates the neuronal differentiation of radial glial cells from the rat hippocampus. *Stem Cells Transl Med*, 4(1), 110-116. doi:10.5966/sctm.2014-0158
- Liodis, P., Denaxa, M., Grigoriou, M., Akufo-Addo, C., Yanagawa, Y., & Pachnis, V. (2007). Lhx6 activity is required for the normal migration and specification of cortical interneuron subtypes. *J Neurosci*, 27(12), 3078-3089. doi:10.1523/JNEUROSCI.3055-06.2007
- 1455 Liour, S. S., Kraemer, S. A., Dinkins, M. B., Su, C. Y., Yanagisawa, M., & Yu, R. K. (2006). Further characterization of embryonic stem cell-derived radial glial cells. *Glia*, 53(1), 43-56. doi:10.1002/glia.20257
- 1460 Liu, Y., Bergmann, T., Mori, Y., Peralvo Vidal, J. M., Pihl, M., Vasistha, N. A., . . . Hall, V. J. (2021). *Development of the entorhinal cortex occurs via parallel lamination during neurogenesis*. *Frontiers in Neuroanatomy*. Retrieved from <https://www.frontiersin.org/articles/10.3389/fnana.2021.663667/abstract>
- Lu, J., Zhong, X., Liu, H., Hao, L., Huang, C. T., Sherafat, M. A., . . . Zhang, S. C. (2016). Generation of serotonin neurons from human pluripotent stem cells. *Nat Biotechnol*, 34(1), 89-94. doi:10.1038/nbt.3435
- 1465 Magri, L., Gacias, M., Wu, M., Swiss, V. A., Janssen, W. G., & Casaccia, P. (2014). c-Myc-dependent transcriptional regulation of cell cycle and nucleosomal histones during oligodendrocyte differentiation. *Neuroscience*, 276, 72-86. doi:10.1016/j.neuroscience.2014.01.051
- 1470 Medina, L., Abellan, A., & Desfilis, E. (2017). Contribution of Genoarchitecture to Understanding Hippocampal Evolution and Development. *Brain Behav Evol*, 90(1), 25-40. doi:10.1159/000477558
- Mesman, S., Bakker, R., & Smidt, M. P. (2020). Tcf4 is required for correct brain development during embryogenesis. *Mol Cell Neurosci*, 106, 103502. doi:10.1016/j.mcn.2020.103502
- 1475 Miao, C., Cao, Q., Moser, M. B., & Moser, E. I. (2017). Parvalbumin and Somatostatin Interneurons Control Different Space-Coding Networks in the Medial Entorhinal Cortex. *Cell*, 171(3), 507-521 e517. doi:10.1016/j.cell.2017.08.050



- 1480 Mitchell, A. C., Javidfar, B., Pothula, V., Ibi, D., Shen, E. Y., Peter, C. J., . . . Akbarian, S. (2018). MEF2C transcription factor is associated with the genetic and epigenetic risk architecture of schizophrenia and improves cognition in mice. *Mol Psychiatry*, 23(1), 123-132. doi:10.1038/mp.2016.254
- 1485 Murillo, A., Navarro, A. I., Puelles, E., Zhang, Y., Petros, T. J., & Perez-Otano, I. (2021). Temporal Dynamics and Neuronal Specificity of Grin3a Expression in the Mouse Forebrain. *Cereb Cortex*, 31(4), 1914-1926. doi:10.1093/cercor/bhaa330
- Nat, R., Nilbratt, M., Narkilahti, S., Winblad, B., Hovatta, O., & Nordberg, A. (2007). Neurogenic neuroepithelial and radial glial cells generated from six human embryonic stem cell lines in serum-free suspension and adherent cultures. *Glia*, 55(4), 385-399. doi:10.1002/glia.20463
- 1490 Nicaise, A. M., Wagstaff, L. J., Willis, C. M., Paisie, C., Chandok, H., Robson, P., . . . Crocker, S. J. (2019). Cellular senescence in progenitor cells contributes to diminished remyelination potential in progressive multiple sclerosis. *Proc Natl Acad Sci U S A*, 116(18), 9030-9039. doi:10.1073/pnas.1818348116
- 1495 Nilssen, E. S., Jacobsen, B., Fjeld, G., Nair, R. R., Blankvoort, S., Kentros, C., & Witter, M. P. (2018). Inhibitory Connectivity Dominates the Fan Cell Network in Layer II of Lateral Entorhinal Cortex. *J Neurosci*, 38(45), 9712-9727. doi:10.1523/JNEUROSCI.1290-18.2018
- 1500 Oh, Y., & Jang, J. (2019). Directed Differentiation of Pluripotent Stem Cells by Transcription Factors. *Mol Cells*, 42(3), 200-209. doi:10.14348/molcells.2019.2439
- Olton, D. S., Walker, J. A., & Wolf, W. A. (1982). A disconnection analysis of hippocampal function. *Brain Res*, 233(2), 241-253. Retrieved from <https://www.ncbi.nlm.nih.gov/pubmed/7059809>
- 1505 Onorati, M., Camnasio, S., Binetti, M., Jung, C. B., Moretti, A., & Cattaneo, E. (2010). Neupotent self-renewing neural stem (NS) cells derived from mouse induced pluripotent stem (iPS) cells. *Mol Cell Neurosci*, 43(3), 287-295. doi:10.1016/j.mcn.2009.12.002
- 1510 Perez-Garcia, C. G., Gonzalez-Delgado, F. J., Suarez-Sola, M. L., Castro-Fuentes, R., Martin-Trujillo, J. M., Ferres-Torres, R., & Meyer, G. (2001). Reelin-immunoreactive neurons in the adult vertebrate pallium. *J Chem Neuroanat*, 21(1), 41-51. Retrieved from <https://www.ncbi.nlm.nih.gov/pubmed/11173219>
- 1515 Pesold, C., Impagnatiello, F., Pisu, M. G., Uzunov, D. P., Costa, E., Guidotti, A., & Caruncho, H. J. (1998). Reelin is preferentially expressed in neurons synthesizing gamma-aminobutyric acid in cortex and hippocampus of adult rats. *Proc Natl Acad Sci U S A*, 95(6), 3221-3226. doi:10.1073/pnas.95.6.3221
- 1520 Pfisterer, U., Petukhov, V., Demharter, S., Meichsner, J., Thompson, J. J., Batiuk, M. Y., . . . Khodosevich, K. (2020). Identification of epilepsy-associated neuronal subtypes and gene expression underlying epileptogenesis. *Nat Commun*, 11(1), 5038. doi:10.1038/s41467-020-18752-7
- Pla, R., Stanco, A., Howard, M. A., Rubin, A. N., Vogt, D., Mortimer, N., . . . Rubenstein, J. L. R. (2018). Dlx1 and Dlx2 Promote Interneuron GABA Synthesis, Synaptogenesis, and Dendritogenesis. *Cereb Cortex*, 28(11), 3797-3815. doi:10.1093/cercor/bhx241
- 1525 Polepalli, J. S., Gooch, H., & Sah, P. (2020). Diversity of interneurons in the lateral and basal amygdala. *NPJ Sci Learn*, 5, 10. doi:10.1038/s41539-020-0071-z
- Pollen, A. A., Nowakowski, T. J., Chen, J., Retallack, H., Sandoval-Espinosa, C., Nicholas, C. R., . . . Kriegstein, A. R. (2015). Molecular identity of human outer radial glia during cortical development. *Cell*, 163(1), 55-67. doi:10.1016/j.cell.2015.09.004

- 1530 Puelles, E., Annino, A., Tuorto, F., Usiello, A., Acampora, D., Czerny, T., . . . Simeone, A.  
(2004). *Otx2* regulates the extent, identity and fate of neuronal progenitor  
domains in the ventral midbrain. *Development*, *131*(9), 2037-2048.  
doi:10.1242/dev.01107
- 1535 Qin, H., Zhao, A., & Fu, X. (2017). Small molecules for reprogramming and  
transdifferentiation. *Cell Mol Life Sci*, *74*(19), 3553-3575. doi:10.1007/s00018-  
017-2586-x
- Quirk, G. J., Muller, R. U., Kubie, J. L., & Ranck, J. B., Jr. (1992). The positional firing  
properties of medial entorhinal neurons: description and comparison with  
hippocampal place cells. *J Neurosci*, *12*(5), 1945-1963. Retrieved from  
<https://www.ncbi.nlm.nih.gov/pubmed/1578279>
- 1540 Ramsden, H. L., Surmeli, G., McDonagh, S. G., & Nolan, M. F. (2015). Laminar and  
dorsoventral molecular organization of the medial entorhinal cortex revealed by  
large-scale anatomical analysis of gene expression. *PLoS Comput Biol*, *11*(1),  
e1004032. doi:10.1371/journal.pcbi.1004032
- 1545 Reinchisi, G., Limaye, P. V., Singh, M. B., Antic, S. D., & Zecevic, N. (2013). Neurogenic  
potential of hESC-derived human radial glia is amplified by human fetal cells. *Stem  
Cell Res*, *11*(1), 587-600. doi:10.1016/j.scr.2013.03.004
- 1550 Reyes, J. H., O'Shea, K. S., Wys, N. L., Velkey, J. M., Prieskorn, D. M., Wesolowski, K., . . .  
Altschuler, R. A. (2008). Glutamatergic neuronal differentiation of mouse  
embryonic stem cells after transient expression of neurogenin 1 and treatment  
with BDNF and GDNF: in vitro and in vivo studies. *J Neurosci*, *28*(48), 12622-12631.  
doi:10.1523/JNEUROSCI.0563-08.2008
- 1555 Ridley, R. M., Samson, N. A., Baker, H. F., & Johnson, J. A. (1988). Visuospatial learning  
impairment following lesion of the cholinergic projection to the hippocampus.  
*Brain Res*, *456*(1), 71-87. Retrieved from  
<https://www.ncbi.nlm.nih.gov/pubmed/3136860>
- Rowland, D. C., Obenhaus, H. A., Skytoen, E. R., Zhang, Q., Kentros, C. G., Moser, E. I., &  
Moser, M. B. (2018). Functional properties of stellate cells in medial entorhinal  
cortex layer II. *Elife*, *7*, e36664. doi:10.7554/eLife.36664
- 1560 Rudy, B., Fishell, G., Lee, S., & Hjerling-Leffler, J. (2011). Three groups of interneurons  
account for nearly 100% of neocortical GABAergic neurons. *Dev Neurobiol*, *71*(1),  
45-61. doi:10.1002/dneu.20853
- Sances, S., Bruijn, L. I., Chandran, S., Eggan, K., Ho, R., Klim, J. R., . . . Svendsen, C. N. (2016).  
Modeling ALS with motor neurons derived from human induced pluripotent stem  
cells. *Nat Neurosci*, *19*(4), 542-553. doi:10.1038/nn.4273
- 1565 Sargolini, F., Fyhn, M., Hafting, T., McNaughton, B. L., Witter, M. P., Moser, M. B., & Moser,  
E. I. (2006). Conjunctive representation of position, direction, and velocity in  
entorhinal cortex. *Science*, *312*(5774), 758-762. doi:10.1126/science.1125572
- Satija, R., Farrell, J. A., Gennert, D., Schier, A. F., & Regev, A. (2015). Spatial reconstruction  
of single-cell gene expression data. *Nat Biotechnol*, *33*(5), 495-502.  
doi:10.1038/nbt.3192
- 1570 Schmidt-Hieber, C., & Hausser, M. (2013). Cellular mechanisms of spatial navigation in the  
medial entorhinal cortex. *Nat Neurosci*, *16*(3), 325-331. doi:10.1038/nn.3340
- Schoof, M., Hellwig, M., Harrison, L., Holdhof, D., Lauffer, M. C., Niesen, J., . . . Schuller, U.  
(2020). The basic helix-loop-helix transcription factor TCF4 impacts brain  
architecture as well as neuronal morphology and differentiation. *Eur J Neurosci*,  
1575 *51*(11), 2219-2235. doi:10.1111/ejn.14674

- 1580 Seress, L., Leranth, C., & Frotscher, M. (1994). Distribution of calbindin D28k immunoreactive cells and fibers in the monkey hippocampus, subicular complex and entorhinal cortex. A light and electron microscopic study. *J Hirnforsch*, *35*(4), 473-486. Retrieved from <https://www.ncbi.nlm.nih.gov/pubmed/7884210>
- Shimada, T., Takai, Y., Shinohara, K., Yamasaki, A., Tominaga-Yoshino, K., Ogura, A., . . . Hashimoto, H. (2012). A simplified method to generate serotonergic neurons from mouse embryonic stem and induced pluripotent stem cells. *J Neurochem*, *122*(1), 81-93. doi:10.1111/j.1471-4159.2012.07724.x
- 1585 Shin, E., Palmer, M. J., Li, M., & Fricker, R. A. (2012). GABAergic neurons from mouse embryonic stem cells possess functional properties of striatal neurons in vitro, and develop into striatal neurons in vivo in a mouse model of Huntington's disease. *Stem Cell Rev Rep*, *8*(2), 513-531. doi:10.1007/s12015-011-9290-2
- 1590 Solstad, T., Boccara, C. N., Kropff, E., Moser, M. B., & Moser, E. I. (2008). Representation of geometric borders in the entorhinal cortex. *Science*, *322*(5909), 1865-1868. doi:10.1126/science.1166466
- Stensola, T., & Moser, E. I. (2016). Grid Cells and Spatial Maps in Entorhinal Cortex and Hippocampus. In G. Buzsaki & Y. Christen (Eds.), *Micro-, Meso- and Macro-Dynamics of the Brain* (pp. 59-80). Cham (CH).
- 1595 Studer, L. (2012). Derivation of dopaminergic neurons from pluripotent stem cells. *Prog Brain Res*, *200*, 243-263. doi:10.1016/B978-0-444-59575-1.00011-9
- Sun, A. X., Yuan, Q., Tan, S., Xiao, Y., Wang, D., Khoo, A. T., . . . Je, H. S. (2016). Direct Induction and Functional Maturation of Forebrain GABAergic Neurons from Human Pluripotent Stem Cells. *Cell Rep*, *16*(7), 1942-1953. doi:10.1016/j.celrep.2016.07.035
- 1600 Tang, Q., Buralossi, A., Ebbesen, C. L., Ray, S., Naumann, R., Schmidt, H., . . . Brecht, M. (2014). Pyramidal and stellate cell specificity of grid and border representations in layer 2 of medial entorhinal cortex. *Neuron*, *84*(6), 1191-1197. doi:10.1016/j.neuron.2014.11.009
- 1605 Tasic, B., Yao, Z., Graybiel, L. T., Smith, K. A., Nguyen, T. N., Bertagnolli, D., . . . Zeng, H. (2018). Shared and distinct transcriptomic cell types across neocortical areas. *Nature*, *563*(7729), 72-78. doi:10.1038/s41586-018-0654-5
- Taube, J. S., Muller, R. U., & Ranck, J. B., Jr. (1990). Head-direction cells recorded from the postsubiculum in freely moving rats. II. Effects of environmental manipulations. *J Neurosci*, *10*(2), 436-447. Retrieved from <https://www.ncbi.nlm.nih.gov/pubmed/2303852>
- 1610 Thoma, E. C., Wischmeyer, E., Offen, N., Maurus, K., Siren, A. L., Scharl, M., & Wagner, T. U. (2012). Ectopic expression of neurogenin 2 alone is sufficient to induce differentiation of embryonic stem cells into mature neurons. *PLoS One*, *7*(6), e38651. doi:10.1371/journal.pone.0038651
- 1615 Thomsen, R., Solvsten, C. A., Linnet, T. E., Blechinger, J., & Nielsen, A. L. (2010). Analysis of qPCR data by converting exponentially related Ct values into linearly related X0 values. *J Bioinform Comput Biol*, *8*(5), 885-900. doi:10.1142/s0219720010004963
- 1620 Tirosh, I., Izar, B., Prakadan, S. M., Wadsworth, M. H., 2nd, Treacy, D., Trombetta, J. J., . . . Garraway, L. A. (2016). Dissecting the multicellular ecosystem of metastatic melanoma by single-cell RNA-seq. *Science*, *352*(6282), 189-196. doi:10.1126/science.aad0501
- Tofoli, F. A., Semeano, A. T. S., Oliveira-Giacomelli, A., Goncalves, M. C. B., Ferrari, M. F. R., Veiga Pereira, L., & Ulrich, H. (2019). Midbrain Dopaminergic Neurons

- 1625 Differentiated from Human-Induced Pluripotent Stem Cells. *Methods Mol Biol*, 1919, 97-118. doi:10.1007/978-1-4939-9007-8\_8
- Vadodaria, K. C., Marchetto, M. C., Mertens, J., & Gage, F. H. (2016). Generating human serotonergic neurons in vitro: Methodological advances. *Bioessays*, 38(11), 1123-1129. doi:10.1002/bies.201600127
- 1630 van der Maaten, L., & Hinton, G. (2008). Visualizing data using t-SNE. *Journal of Machine Learning Research*, 9, 2579-2605.
- Varga, C., Lee, S. Y., & Soltesz, I. (2010). Target-selective GABAergic control of entorhinal cortex output. *Nat Neurosci*, 13(7), 822-824. doi:10.1038/nn.2570
- 1635 Vucurovic, K., Gallopin, T., Ferezou, I., Rancillac, A., Chameau, P., van Hooft, J. A., . . . Vitalis, T. (2010). Serotonin 3A receptor subtype as an early and protracted marker of cortical interneuron subpopulations. *Cereb Cortex*, 20(10), 2333-2347. doi:10.1093/cercor/bhp310
- Wang, X., Hou, J., Quedenau, C., & Chen, W. (2016). Pervasive isoform-specific translational regulation via alternative transcription start sites in mammals. *Mol Syst Biol*, 12(7), 875. doi:10.15252/msb.20166941
- 1640 Wang, Y., Dye, C. A., Sohal, V., Long, J. E., Estrada, R. C., Roztocil, T., . . . Rubenstein, J. L. (2010). Dlx5 and Dlx6 regulate the development of parvalbumin-expressing cortical interneurons. *J Neurosci*, 30(15), 5334-5345. doi:10.1523/JNEUROSCI.5963-09.2010
- 1645 Winterer, J., Maier, N., Wozny, C., Beed, P., Breustedt, J., Evangelista, R., . . . Schmitz, D. (2017). Excitatory Microcircuits within Superficial Layers of the Medial Entorhinal Cortex. *Cell Rep*, 19(6), 1110-1116. doi:10.1016/j.celrep.2017.04.041
- Witter, M. P., Doan, T. P., Jacobsen, B., Nilssen, E. S., & Ohara, S. (2017). Architecture of the Entorhinal Cortex A Review of Entorhinal Anatomy in Rodents with Some Comparative Notes. *Front Syst Neurosci*, 11, 46. doi:10.3389/fnsys.2017.00046
- 1650 Workman, M. J., Mahe, M. M., Trisno, S., Poling, H. M., Watson, C. L., Sundaram, N., . . . Wells, J. M. (2017). Engineered human pluripotent-stem-cell-derived intestinal tissues with a functional enteric nervous system. *Nat Med*, 23(1), 49-59. doi:10.1038/nm.4233
- 1655 Xue, Y., Zhan, X., Sun, S., Karuppagounder, S. S., Xia, S., Dawson, V. L., . . . Ying, M. (2019). Synthetic mRNAs Drive Highly Efficient iPS Cell Differentiation to Dopaminergic Neurons. *Stem Cells Transl Med*, 8(2), 112-123. doi:10.1002/sctm.18-0036
- Yang, N., Chanda, S., Marro, S., Ng, Y. H., Janas, J. A., Haag, D., . . . Wernig, M. (2017). Generation of pure GABAergic neurons by transcription factor programming. *Nat Methods*, 14(6), 621-628. doi:10.1038/nmeth.4291
- 1660 Ye, J., Witter, M. P., Moser, M. B., & Moser, E. I. (2018). Entorhinal fast-spiking speed cells project to the hippocampus. *Proc Natl Acad Sci U S A*, 115(7), E1627-E1636. doi:10.1073/pnas.1720855115
- Zhang, P., Xia, N., & Reijo Pera, R. A. (2014). Directed dopaminergic neuron differentiation from human pluripotent stem cells. *J Vis Exp*(91), 51737. doi:10.3791/51737
- 1665 Zhang, Y., Pak, C., Han, Y., Ahlenius, H., Zhang, Z., Chanda, S., . . . Sudhof, T. C. (2013). Rapid single-step induction of functional neurons from human pluripotent stem cells. *Neuron*, 78(5), 785-798. doi:10.1016/j.neuron.2013.05.029
- Zhong, S., Zhang, S., Fan, X., Wu, Q., Yan, L., Dong, J., . . . Wang, X. (2018). A single-cell RNA-seq survey of the developmental landscape of the human prefrontal cortex. *Nature*, 555(7697), 524-528. doi:10.1038/nature25980
- 1670



Zou, L., Li, H., Han, X., Qin, J., & Song, G. (2020). Runx1t1 promotes the neuronal differentiation in rat hippocampus. *Stem Cell Res Ther*, 11(1), 160. doi:10.1186/s13287-020-01667-x

1675

### Supplementary Figure Legends

1680 **Figure S1. Mitochondrial gene expression in the whole scRNA-seq dataset, evaluation of interneuron (IN) genes in the entorhinal cortex (EC) excitatory neuron/intermediate progenitor (IP) clusters.** (A) The top ten gene features of cluster 31 identified in Seurat using FindAllMarkers (with Wilcoxon Rank Sum test) showed enrichment of mitochondrial genes in the cluster, likely representing dying cells, which resulted in the cluster being removed from further analyses. (B) Expression of the IN markers, *GAD1* and *GAD2* in the IP and excitatory neuron clusters highlight low expression across all the subtypes, with the exception of *GAD2* in PYR12 which suggests it may be an IN progenitor.

1685

1690 **Figure S2. Expression of RELN, PYR and IP cluster markers in sagittal sections of the entorhinal cortex (EC) from the Allen Developing Mouse Brain Atlas and Allen Mouse Brain Atlas.** Expression of select markers for varying excitatory neuron clusters highlighted in Figure 4C were investigated in ISH sagittal sections revealing putative locations of the cell types, such as RELN7 and PYR2 neurons residing in the superficial layers. Image credit: Allen Institute (82-84). Scale bars: 250  $\mu\text{m}$  (for E18.5 and P4) and 500  $\mu\text{m}$  (for P14 and P56).

1695

1700 **Figure S3. Direct programming of induced pluripotent stem cells (iPSCs) using a leave-one-out approach of the stellate cell-specific transcription factors in the presence of *Ngn2* resulted in the production of stellate cell-like cells.** (A) Morphological changes of the two iPSC lines, SFC 180-01-01 (SFC) and WTSli024A (WTS) following transduction with different combinations of five out of the six stellate cell transcription factors (SC TFs), together with *Ngn2* at day (D)10 and D20. Scale bar: 100  $\mu\text{m}$ . (B) Expression of BCL11B in the SFC and WTS cell lines at D10 after transduction with the SC TFs alone, the SC TFs with *Ngn2*, *Ngn2* alone, or with no TFs. HO; Hoechst. Scale bar: 100  $\mu\text{m}$ .

1695

1700

1705 **Figure S4. BCL11B expression in induced pluripotent stem cells (iPSCs) following different combinations of induced transcription factor expression.** BCL11B expression was observed in both iPSC lines SFC 180-01-01 (SFC) and WTSli024A (WTS) transduced with different combinations of five stellate cell transcription factors (SC TFs) in the presence of *Ngn2*, at Day (D)10 and 20 post transduction. HO; Hoechst. Scale bar: 100  $\mu\text{m}$ .

1705

1710 **Figure S5. Validation data for the scRNA-seq experiments.** (A) Violin plots of the number (n) of UMIs and genes in each single-cell sequencing batch. (B) Scatter plots of the number (n) of UMIs versus genes for each single-cell sequencing batch. (C) Fraction of transcripts out of total transcripts for a given gene in empty droplets at representative stages (E70 and Adult), for both isolated nuclei (nc) and whole cell samples. Genes with a fraction above 0.30 were not included as variable genes in the downstream analysis. Abbreviations: n, number; E, embryonic (D) A t-SNE plot of the scRNA-seq dataset prior to fastMNN batch correction.

1710

1715 **Supplementary Information**

Additional file 1: Supplementary Figures  
Figures S1-S5 with figure legends

1720 Additional file 2: Table S1  
Table S1: Human ortholog gene names identified from pig ensemble names

Additional file 3: Table S2  
Table S2: Primers for cloning of plasmids

1725 Additional file 4: Table S3  
Table S3: Primers for qPCR

Additional file 5: Table S4

1730 Table S4: Statistics for scRNA-seq libraries

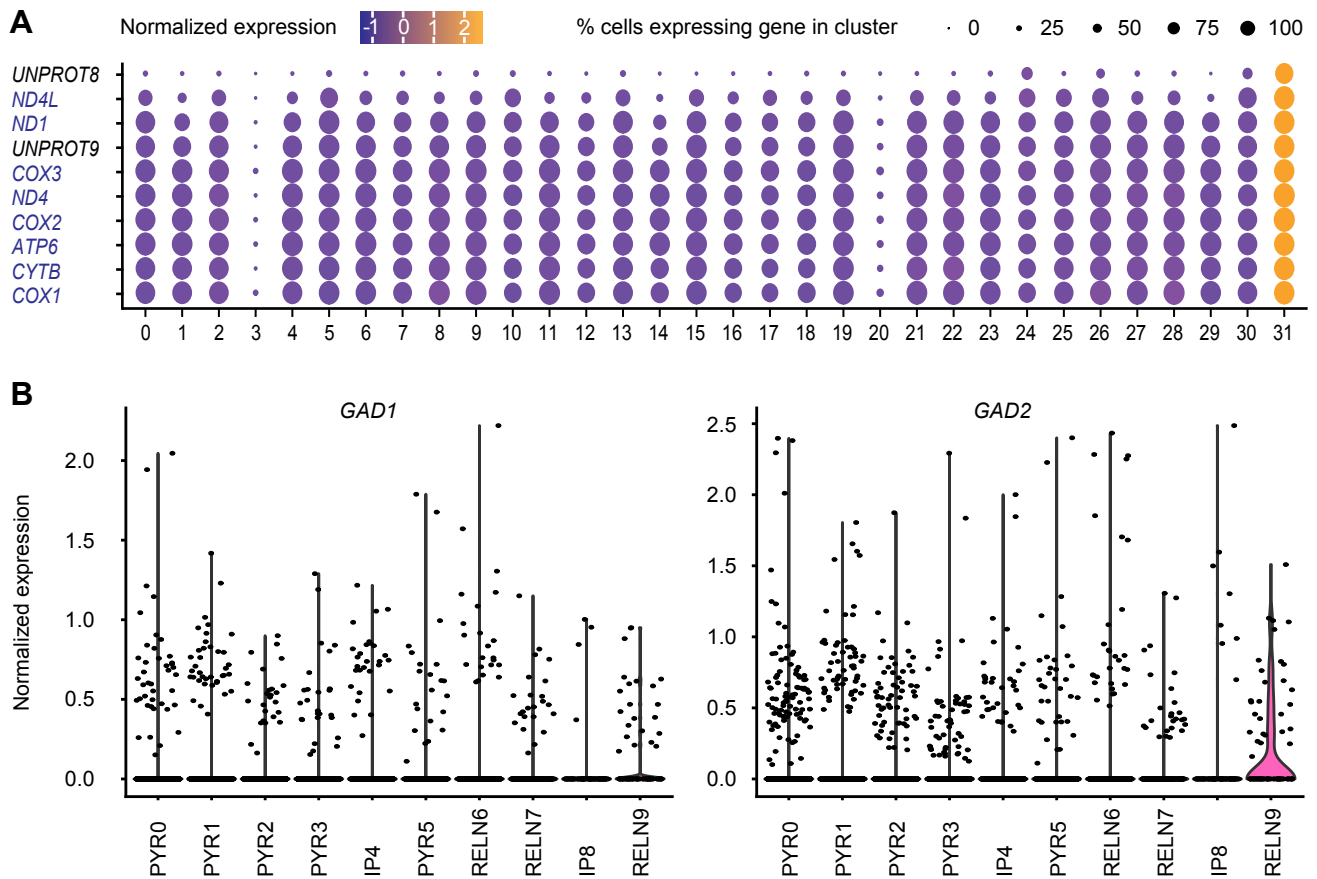

**Figure S1. Mitochondrial gene expression in the whole scRNA-seq dataset, evaluation of interneuron (IN) genes in the entorhinal cortex (EC) excitatory neuron/intermediate progenitor (IP) clusters. (A)** The top ten gene features of cluster 31 identified in Seurat using FindAllMarkers (with Wilcoxon Rank Sum test) showed enrichment of mitochondrial genes in the cluster, likely representing dying cells, which resulted in the cluster being removed from further analyses. **(B)** Expression of the IN markers, GAD1 and GAD2 in the IP and excitatory neuron clusters highlight low expression across all the subtypes, with the exception of GAD2 in PYR12 which suggests it may be an IN progenitor.

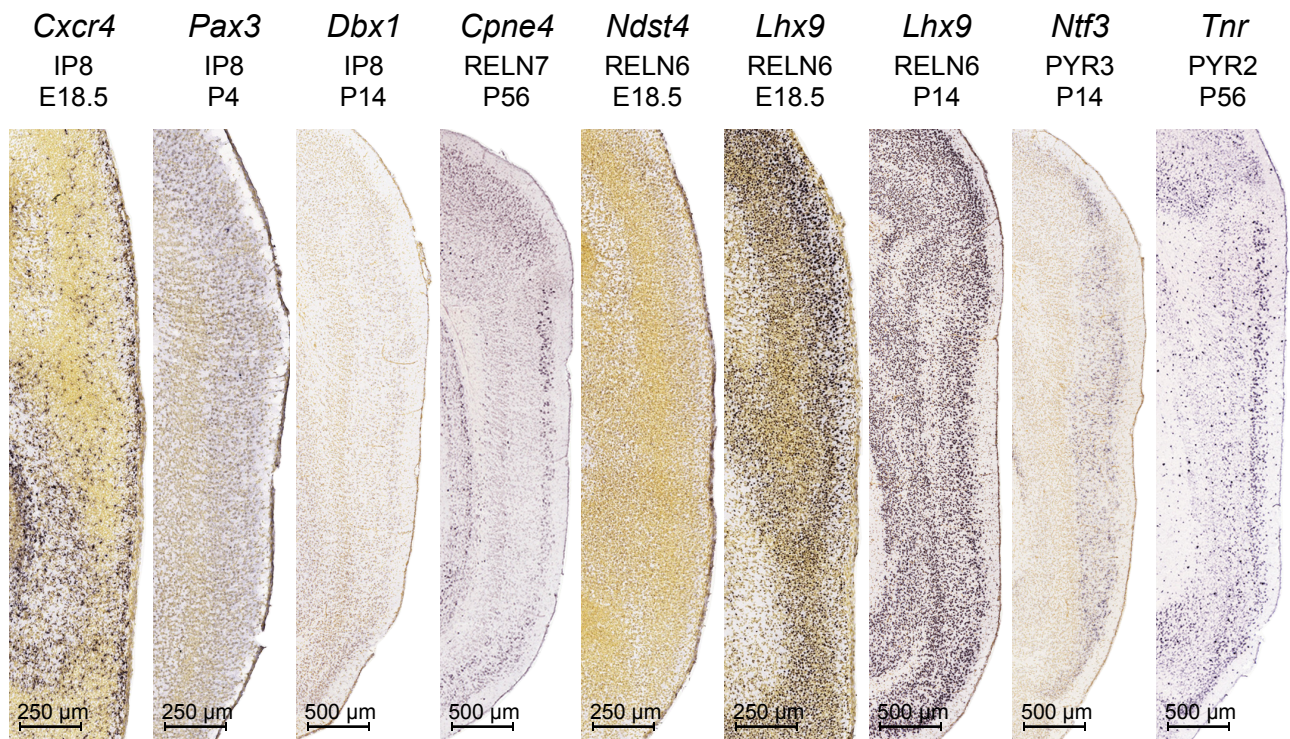

**Figure S2. Expression of RELN, PYR and IP cluster markers in sagittal sections of the entorhinal cortex (EC) from the Allen Developing Mouse Brain Atlas and Allen Mouse Brain Atlas.** Expression of select markers for varying excitatory neuron clusters highlighted in Figure 4C were investigated in ISH sagittal sections revealing putative locations of the cell types, such as RELN7 and PYR2 neurons residing in the superficial layers. Image credit: Allen Institute (82-84). Scale bars: 250  $\mu\text{m}$  (for E18.5 and P4) and 500  $\mu\text{m}$  (for P14 and P56).



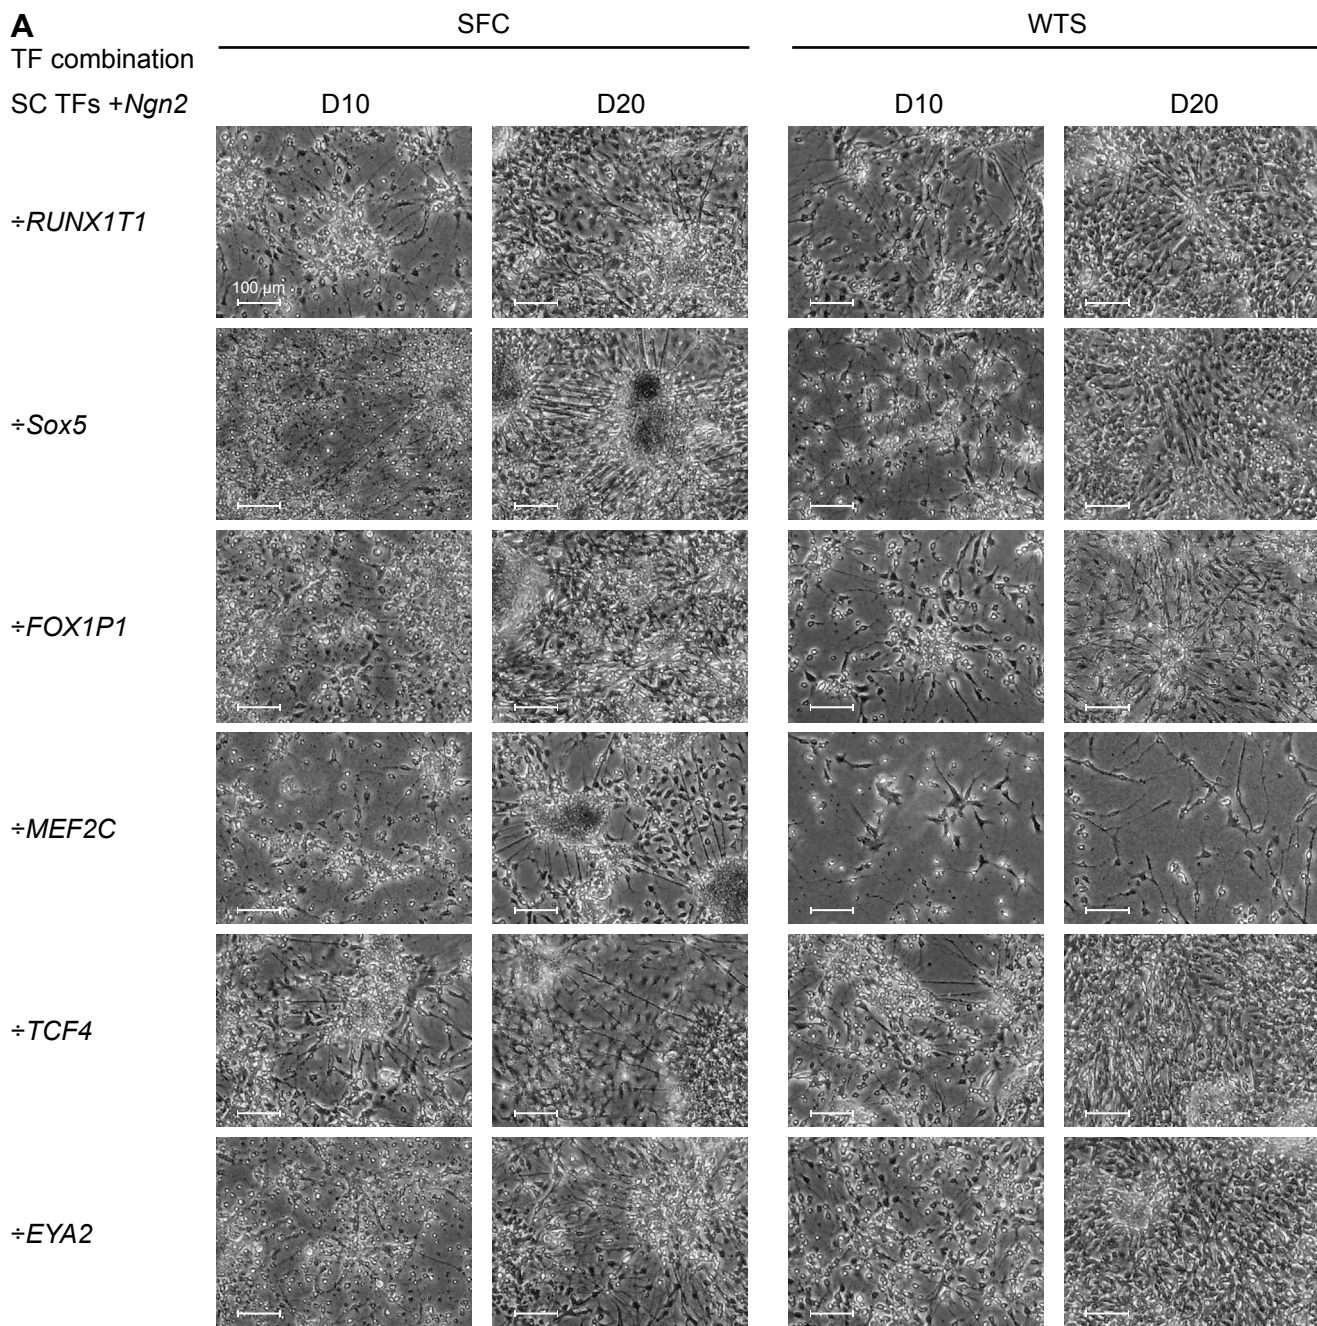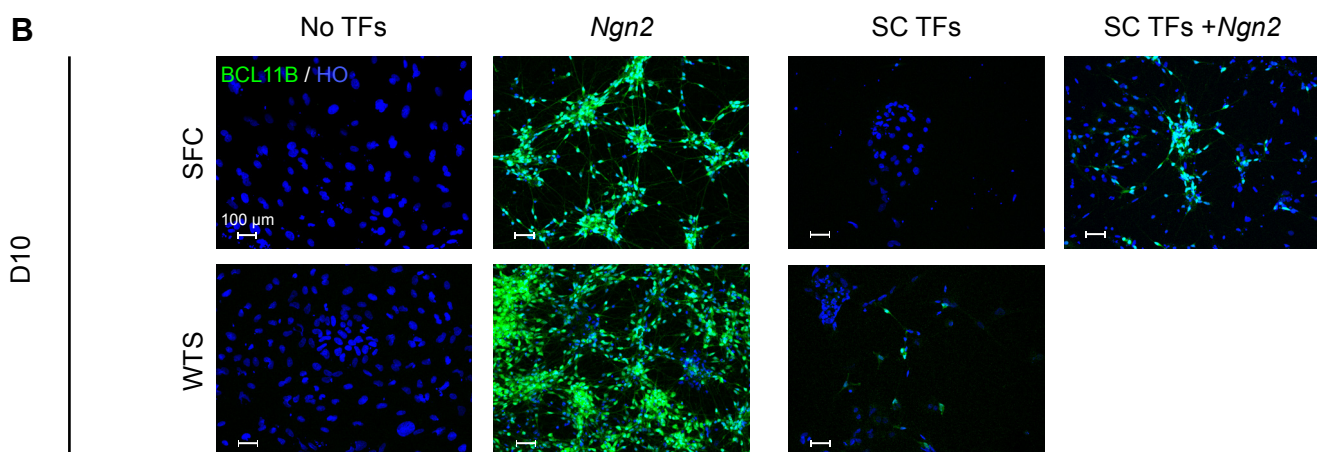

**Figure S3. Direct programming of induced pluripotent stem cells (iPSCs) using a leave-one-out approach of the stellate cell-specific transcription factors in the presence of Ngn2 resulted in the production of stellate cell-like cells. (A)** Morphological changes of the two iPSC lines, SFC 180-01-01 (SFC) and WTSli024A (WTS) following transduction with different combinations of five out of the six stellate cell transcription factors (SC TFs), together with Ngn2 at day (D)10 and D20. Scale bar: 100  $\mu$ m. **(B)** Expression of BCL11B in the SFC and WTS cell lines at D10 after transduction with the SC TFs alone, the SC TFs with Ngn2, Ngn2 alone, or with no TFs. HO; Hoechst. Scale bar: 100  $\mu$ m.



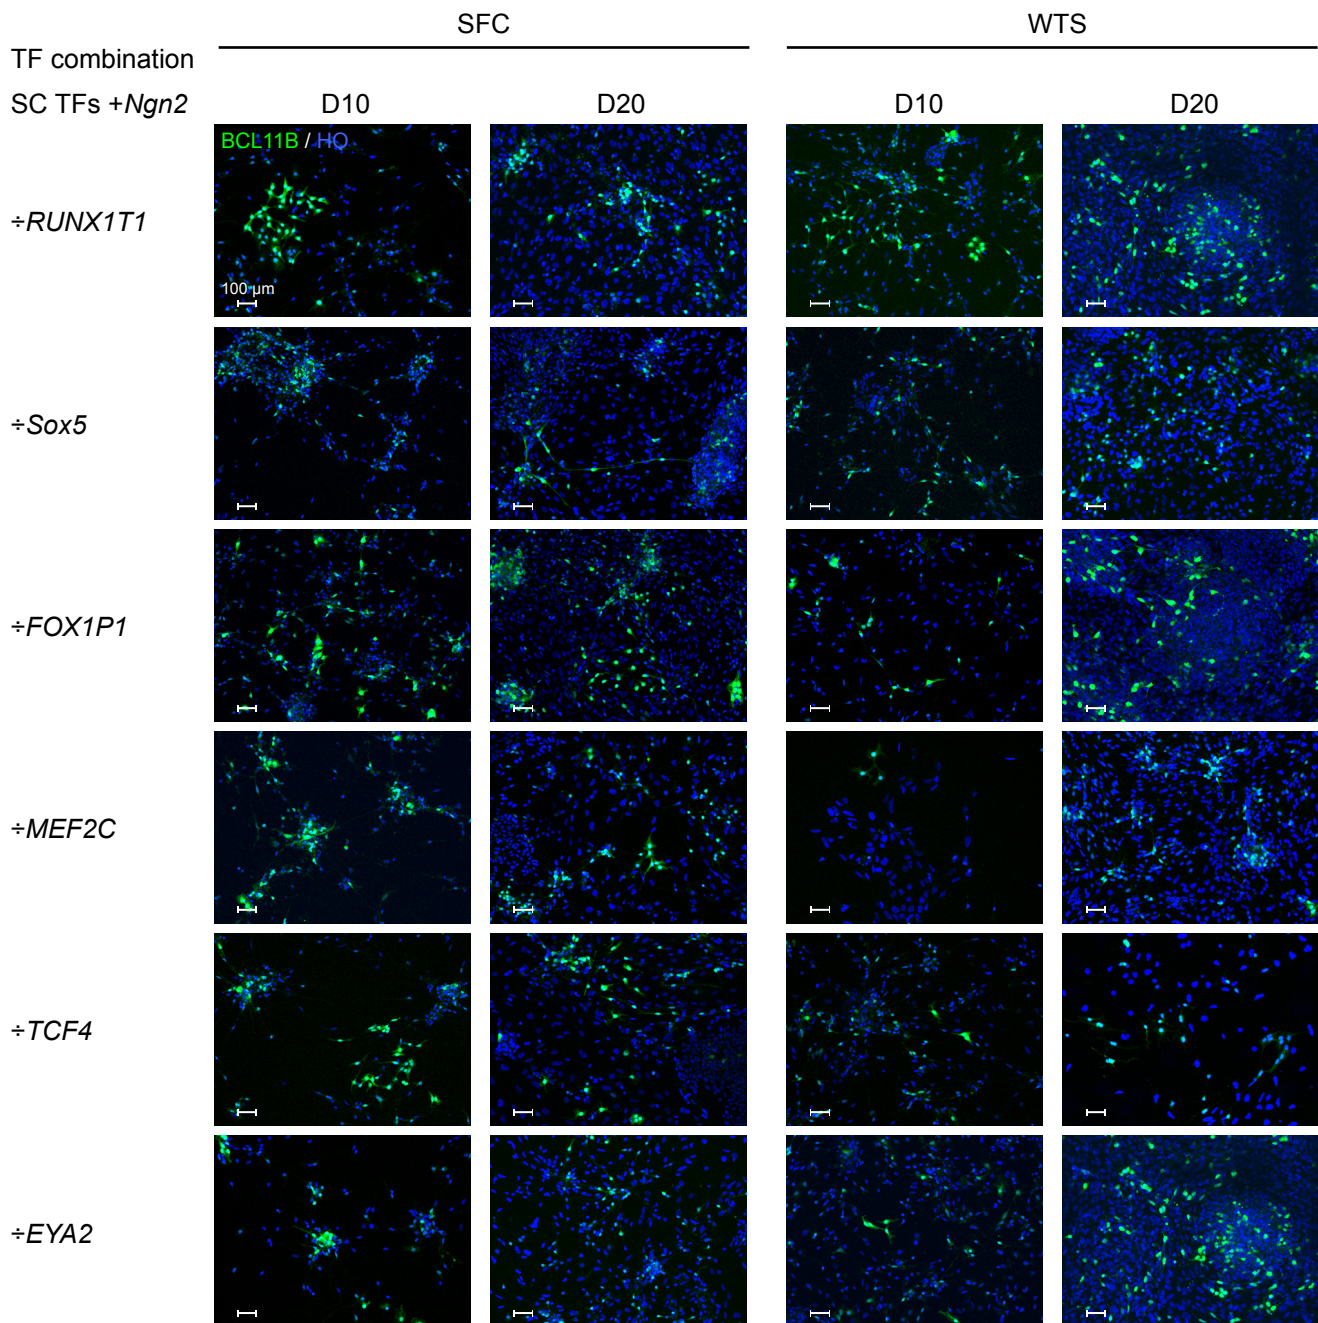

**Figure S4. BCL11B expression in induced pluripotent stem cells (iPSCs) following different combinations of induced transcription factor expression.** BCL11B expression was observed in both iPSC lines SFC 180-01-01 (SFC) and WTSli024A (WTS) transduced with different combinations of five stellate cell transcription factors (SC TFs) in the presence of Ngn2, at Day (D)10 and 20 post transduction. HO; Hoechst. Scale bar: 100  $\mu$ m.

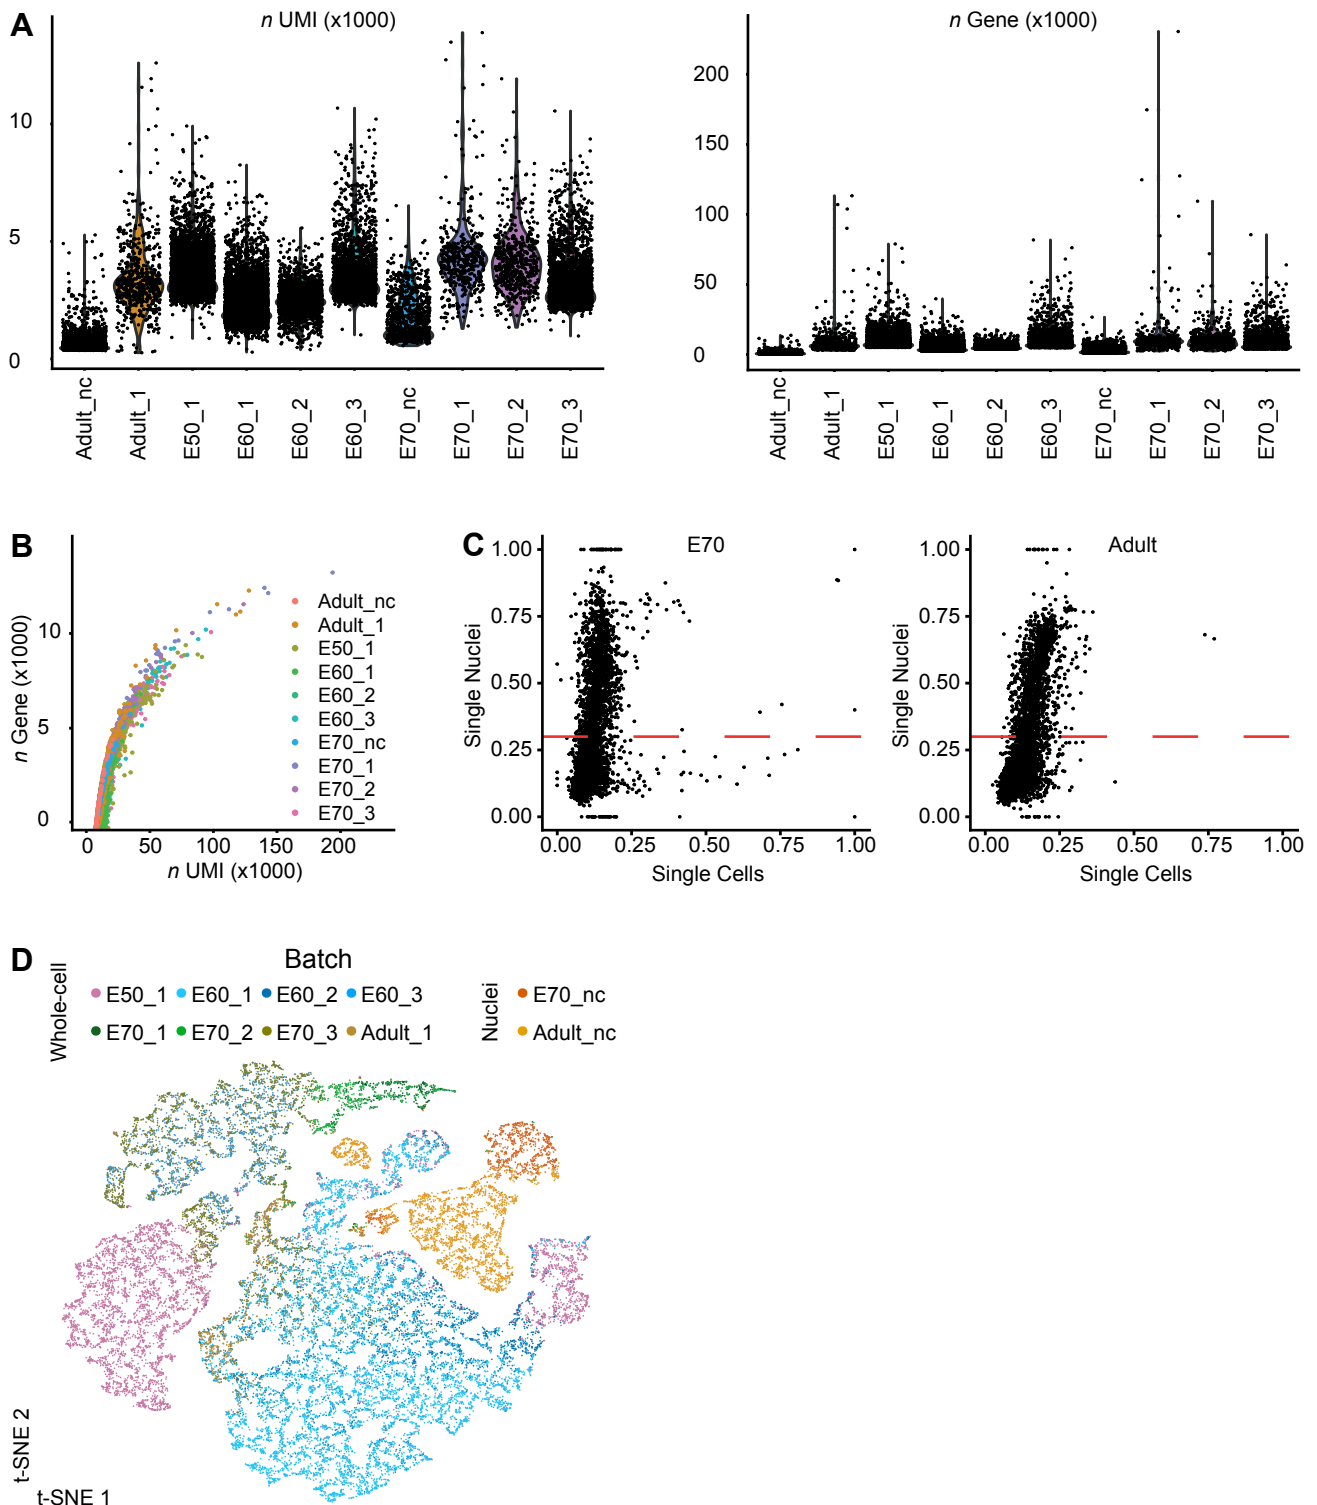

**Figure S5. Validation data for the scRNA-seq experiments.** (A) Violin plots of the number (*n*) of UMIs and genes in each single-cell sequencing batch. (B) Scatter plots of the number (*n*) of UMIs versus genes for each single-cell sequencing batch. (C) Fraction of transcripts out of total transcripts for a given gene in empty droplets at representative stages (E70 and Adult), for both isolated nuclei (nc) and whole cell samples. Genes with a fraction above 0.30 were not included as variable genes in the downstream analysis. Abbreviations: *n*, number; E, embryonic (D) A t-SNE plot of the scRNA-seq dataset prior to fastMNN batch correction.



**Table S1: Human ortholog names identified from pig ensemble names**

| <b>Ensemble Name</b> | <b>Human ortholog names</b> |
|----------------------|-----------------------------|
| ENSSSCG00000010212   | ANK3                        |
| ENSSSCG00000011178   | CPNE4                       |
| ENSSSCG00000015545   | GLUL                        |
| ENSSSCG00000009327   | HMGB1                       |
| ENSSSCG00000011267   | MOBP                        |
| ENSSSCG00000015401   | PCLO                        |
| ENSSSCG00000007644   | PILRB                       |
| ENSSSCG00000016219   | RESP18                      |
| ENSSSCG00000029160   | UNPROT1                     |
| ENSSSCG00000006963   | UNPROT2                     |
| ENSSSCG00000032935   | UNPROT3                     |
| ENSSSCG00000017019   | UNPROT5                     |
| ENSSSCG00000034554   | UNPROT8                     |
| ENSSSCG00000035520   | UNPROT9                     |
| ENSSSCG00000036465   | USP6NL                      |
| ENSSSCG00000005658   | ZDHHCL2                     |
| ENSSSCG00000005063   | OTX2                        |
| ENSSSCG00000027279   | PTHR                        |

**Table S2: Primers for cloning of plasmids**

| <b>Target gene</b> | <b>Forward / reverse</b> | <b>Sequence (5' - 3')</b>                    |
|--------------------|--------------------------|----------------------------------------------|
| EYA2               | F                        | GCGCTGAATTCGCCACCATGGTAGAACTAGTGATCTCAC      |
| EYA2               | R                        | CGACATCTAGATAAATACTCCAGCTCCAGG               |
| RUNX1T1            | F                        | AATTACGTCTCGAATTCGCCACCATGCGTACTGAGAAGCACTCC |
| RUNX1T1            | R                        | AGGTGTCTAGAGCGAGGGGTTGTCTCTATGG              |
| TCF4               | F                        | TATTAGAATTCGCCACCATGCCGCAGCTGAACGGC          |
| TCF4               | R                        | CGGGCTCTAGATTCTAAAGACTTGGTGACGAGCGAC         |
| Foxp1              | F                        | TATTAGAATTCGCCACCATGCAAGAATCTGGGTCTGAG       |
| Foxp1              | R                        | GCCATTCTAGACTCCATGTCCTCATTTACTGGTTCGTC       |
| Sox5               | F                        | TATTAGAATTCGCCACCATGCTTACTGACCCTGATTTAC      |
| Sox5               | R                        | TTTAATCTAGAGTTGGCTTGTCCCGCAATGTGGTTT         |

**Table S3: Primers for qPCR**

| <b>Target gene</b> | <b>Forward / reverse</b> | <b>Sequence (5' - 3')</b> |
|--------------------|--------------------------|---------------------------|
| B-actin            | F                        | AACTTGCTTGGTGGAAAGGA      |
| B-actin            | R                        | AGTTTGCAGTGAGCCGAGAT      |
| LV2                | F                        | ACTTGAAAGCGAAAGGGAAAC     |
| LV2                | R                        | CACCCATCTCTCTCCTTCTAGCC   |
| GAPDH              | F                        | GGTCGGAGTGAACGGATTTG      |
| GAPDH              | R                        | GTGGAGGTCAATGAAGGGG       |
| BCL11B             | F                        | TGTCCCAGAGGGAGCTCAT       |
| BCL11B             | R                        | ATTTGACACTGGCCACAGGT      |
| SATB2              | F                        | CGGACAGCCTCTCAGTCTCT      |
| SATB2              | R                        | GTTGTCCGGTGTGAGGTTTT      |
| RELN               | F                        | GCCAATTGGTGGACACTTTT      |
| RELN               | R                        | TGAGTTCTCGGGAGGAGAGA      |
| CALB1              | F                        | TGACCACAGTGGCTTCATAGA     |
| CALB1              | R                        | TGGCCATCTCAGTTAATTCCA     |
| LEF1               | F                        | TCATATGATTCCCGGTCCTC      |
| LEF1               | R                        | TGAGGTCTTTTTGGCTCCTG      |
| LHX2               | F                        | GTTTCAGCAAGGACGGTAGC      |
| LHX2               | R                        | CCGTGGTCAGCATCTTGTTA      |

**Table S4: Overview of batches, captured cells, mean reads, number of libraries, and number of brains used for scRNA-seq experiments**

| Batch    | Estimated number of cells | Mean reads per cell | Median genes per cell | Number of reads | Library # | Pooled number of brains |
|----------|---------------------------|---------------------|-----------------------|-----------------|-----------|-------------------------|
| E50_1    | 5506                      | 49042               | 3448                  | 270029135       | 2         | 3                       |
| E60_1    | 8171                      | 27580               | 2129                  | 225357492       | 3         | 1                       |
| E60_2    | 3479                      | 68619               | 2548                  | 238726637       | 4         | 1                       |
| E60_3    | 2696                      | 98734               | 3335                  | 266189304       | 1         | 2                       |
| E70_nc   | 858                       | 305266              | 1584                  | 261918893       | 5         | 1                       |
| E70_1    | 493                       | 599954              | 4125                  | 295777496       | 3         | 1                       |
| E70_2    | 617                       | 484686              | 3927                  | 299051391       | 2         | 1                       |
| E70_3    | 3120                      | 80781               | 2990                  | 252038762       | 1         | 2                       |
| Adult_nc | 2552                      | 90774               | 560                   | 231655848       | 5         | 1                       |
| Adult_1  | 737                       | 389149              | 3214                  | 286802165       | 4         | 1                       |
